# Supplementary material for: Non-Coding RNAs and Innovative Therapeutic Strategies to Target the 5’UTR of SARS-CoV-2
Source: Preprints.org preprint supplement (doi:10.20944/preprints202004.0425.v1), 2020-04-24

Reference sequence (1): AP006557.1\_SARS\_coronavirus\_TWH\_genomic\_RNA\_complete\_genome
Identities normalised by aligned length.
Colored by: identity

Table with columns: ID, Name, cov, pid, alignment score, and sequence. Contains 114 rows of sequence alignment data for various SARS-CoV-2 genomes.

Table with columns: ID, Name, cov, pid, alignment score, and sequence. Contains 114 rows of sequence alignment data for various SARS-CoV-2 genomes, continuing from the previous table.





| Accession | Sequence ID | Source                                                                             | Length  | Cov    | Pid    | Score  | Sequence                                                                     |
|-----------|-------------|------------------------------------------------------------------------------------|---------|--------|--------|--------|------------------------------------------------------------------------------|
| 111       | CQ918584.1  | Sequence_1_from_Patent_WO2004096842                                                | 95,000  | 95.0%  | 95.0%  | 95.0%  | GTGTTCAGTGCATCATCAGCATACTAGGTTTCTGTCGGGTTGACCGAAGGTAAAGTGGAGAGCCTGTGTTCTTGGT |
| 112       | CQ918585.1  | Sequence_2_from_Patent_WO2004096842                                                | 95,000  | 95.0%  | 95.0%  | 95.0%  | GTGTTCAGTGCATCATCAGCATACTAGGTTTCTGTCGGGTTGACCGAAGGTAAAGTGGAGAGCCTGTGTTCTTGGT |
| 113       | CQ918598.1  | Sequence_15_from_Patent_WO2004096842                                               | 100,000 | 100.0% | 100.0% | 100.0% | GTGTTCAGTGCATCATCAGCATACTAGGTTTCTGTCGGGTTGACCGAAGGTAAAGTGGAGAGCCTGTGTTCTTGGT |
| 114       | NC_004718.3 | SARS_coronavirus_complete_genome                                                   | 100,000 | 100.0% | 100.0% | 100.0% | GTGTTCAGTGCATCATCAGCATACTAGGTTTCTGTCGGGTTGACCGAAGGTAAAGTGGAGAGCCTGTGTTCTTGGT |
|           |             | consensus/100%                                                                     |         |        |        |        | .....GACCGAAGGTAAAGT.....                                                    |
|           |             | consensus/90%                                                                      |         |        |        |        | GTGTTCAGTGCATCATCAGCATACTAGGTTTCTGTCGGGTTGACCGAAGGTAAAGTGGAGAGCCTGTGTTCTTGGT |
|           |             | consensus/80%                                                                      |         |        |        |        | GTGTTCAGTGCATCATCAGCATACTAGGTTTCTGTCGGGTTGACCGAAGGTAAAGTGGAGAGCCTGTGTTCTTGGT |
|           |             | consensus/70%                                                                      |         |        |        |        | GTGTTCAGTGCATCATCAGCATACTAGGTTTCTGTCGGGTTGACCGAAGGTAAAGTGGAGAGCCTGTGTTCTTGGT |
|           |             |                                                                                    |         | cov    | pid    | 321    |                                                                              |
| 1         | AP006557.1  | SARS_coronavirus_TWH_genomic_RNA_complete_genome                                   | 100,000 | 100.0% | 100.0% | 100.0% | TCAACGAGAAAAACA-----                                                         |
| 2         | AP006558.1  | SARS_coronavirus_TWJ_genomic_RNA_complete_genome                                   | 100,000 | 100.0% | 100.0% | 100.0% | TCAACGAGAAAAACA-----                                                         |
| 3         | AP006559.1  | SARS_coronavirus_TWK_genomic_RNA_complete_genome                                   | 100,000 | 100.0% | 100.0% | 100.0% | TCAACGAGAAAAACA-----                                                         |
| 4         | AP006560.1  | SARS_coronavirus_TWS_genomic_RNA_complete_genome                                   | 100,000 | 100.0% | 100.0% | 100.0% | TCAACGAGAAAAACA-----                                                         |
| 5         | AP006561.1  | SARS_coronavirus_TWY_genomic_RNA_complete_genome                                   | 100,000 | 100.0% | 100.0% | 100.0% | TCAACGAGAAAAACA-----                                                         |
| 6         | AY274119.3  | Severe_acute_respiratory_syndrome-related_coronavirus_isolate_Tor2_complete_genome | 100,000 | 100.0% | 100.0% | 100.0% | TCAACGAGAAAAACA-----                                                         |
| 7         | AY278487.3  | SARS_coronavirus_BJ02_complete_genome                                              | 100,000 | 100.0% | 100.0% | 100.0% | TCAACGAGAAAAACA-----                                                         |
| 8         | AY278488.2  | SARS_coronavirus_BJ01_complete_genome                                              | 93.7%   | 93.7%  | 93.7%  | 93.7%  | TCAACGAGAAAAACA-----                                                         |
| 9         | AY278489.2  | SARS_coronavirus_BJ03_complete_genome                                              | 94.7%   | 94.7%  | 94.7%  | 94.7%  | TCAACGAGAAAAACA-----                                                         |
| 10        | AY278490.3  | SARS_coronavirus_BJ03_complete_genome                                              | 98.7%   | 98.7%  | 98.7%  | 98.7%  | TCAACGAGAAAAACA-----                                                         |
| 11        | AY278491.2  | SARS_coronavirus_HKU-39849_complete_genome                                         | 100,000 | 100.0% | 100.0% | 100.0% | TCAACGAGAAAAACA-----                                                         |
| 12        | AY278554.2  | SARS_coronavirus_CUHK-WI_complete_genome                                           | 95.0%   | 95.0%  | 95.0%  | 95.0%  | TCAACGAGAAAAACA-----                                                         |
| 13        | AY278741.1  | SARS_coronavirus_Urbani_complete_genome                                            | 100,000 | 100.0% | 100.0% | 100.0% | TCAACGAGAAAAACA-----                                                         |
| 14        | AY279354.2  | SARS_coronavirus_BJ04_complete_genome                                              | 94.7%   | 94.7%  | 94.7%  | 94.7%  | TCAACGAGAAAAACA-----                                                         |
| 15        | AY282752.2  | SARS_coronavirus_CUHK-Su10_complete_genome                                         | 95.0%   | 95.0%  | 95.0%  | 95.0%  | TCAACGAGAAAAACA-----                                                         |
| 16        | AY283794.1  | SARS_coronavirus_Sin2500_complete_genome                                           | 94.7%   | 94.7%  | 94.7%  | 94.7%  | TCAACGAGAAAAACA-----                                                         |
| 17        | AY283795.1  | SARS_coronavirus_Sin2677_complete_genome                                           | 94.7%   | 94.7%  | 94.7%  | 94.7%  | TCAACGAGAAAAACA-----                                                         |
| 18        | AY283796.1  | SARS_coronavirus_Sin2679_complete_genome                                           | 94.7%   | 94.7%  | 94.7%  | 94.7%  | TCAACGAGAAAAACA-----                                                         |
| 19        | AY283797.1  | SARS_coronavirus_Sin2748_complete_genome                                           | 94.7%   | 94.7%  | 94.7%  | 94.7%  | TCAACGAGAAAAACA-----                                                         |
| 20        | AY283798.2  | SARS_coronavirus_Sin2774_complete_genome                                           | 94.7%   | 94.7%  | 94.7%  | 94.7%  | TCAACGAGAAAAACA-----                                                         |
| 21        | AY291315.1  | SARS_coronavirus_Frankfurt_1_complete_genome                                       | 100,000 | 100.0% | 100.0% | 100.0% | TCAACGAGAAAAACA-----                                                         |
| 22        | AY291451.1  | SARS_coronavirus_TW1_complete_genome                                               | 100,000 | 100.0% | 100.0% | 100.0% | TCAACGAGAAAAACA-----                                                         |
| 23        | AY297028.1  | SARS_coronavirus_ZJ01_complete_genome                                              | 95.3%   | 95.3%  | 95.3%  | 95.3%  | TCAACGAGAAAAACA-----                                                         |
| 24        | AY304486.1  | SARS_coronavirus_S23_complete_genome                                               | 95.0%   | 95.0%  | 95.0%  | 95.0%  | TCAACGAGAAAAACA-----                                                         |
| 25        | AY304488.1  | SARS_coronavirus_S216_complete_genome                                              | 95.0%   | 95.0%  | 95.0%  | 95.0%  | TCAACGAGAAAAACA-----                                                         |
| 26        | AY304495.1  | SARS_coronavirus_G250_complete_genome                                              | 95.0%   | 95.0%  | 95.0%  | 95.0%  | TCAACGAGAAAAACA-----                                                         |
| 27        | AY310120.1  | SARS_coronavirus_FRA_complete_genome                                               | 100,000 | 100.0% | 100.0% | 100.0% | TCAACGAGAAAAACA-----                                                         |
| 28        | AY313906.1  | SARS_coronavirus_GD69_complete_genome                                              | 100,000 | 100.0% | 100.0% | 100.0% | TCAACGAGAAAAACA-----                                                         |
| 29        | AY321118.1  | SARS_coronavirus_TW_C_complete_genome                                              | 100,000 | 100.0% | 100.0% | 100.0% | TCAACGAGAAAAACA-----                                                         |
| 30        | AY323977.2  | SARS_coronavirus_HSR_1_complete_genome                                             | 100,000 | 100.0% | 100.0% | 100.0% | TCAACGAGAAAAACA-----                                                         |
| 31        | AY338174.1  | SARS_coronavirus_Taiwan_TC1_complete_genome                                        | 77.0%   | 77.0%  | 77.0%  | 77.0%  | TCAACGAGAAAAACA-----                                                         |
| 32        | AY338175.1  | SARS_coronavirus_Taiwan_TC2_complete_genome                                        | 77.0%   | 77.0%  | 77.0%  | 77.0%  | TCAACGAGAAAAACA-----                                                         |
| 33        | AY345986.1  | SARS_coronavirus_CUHK-AG01_complete_genome                                         | 95.0%   | 95.0%  | 95.0%  | 95.0%  | TCAACGAGAAAAACA-----                                                         |
| 34        | AY345987.1  | SARS_coronavirus_CUHK-AG02_complete_genome                                         | 95.0%   | 95.0%  | 95.0%  | 95.0%  | TCAACGAGAAAAACA-----                                                         |
| 35        | AY345988.1  | SARS_coronavirus_CUHK-AG03_complete_genome                                         | 95.0%   | 95.0%  | 95.0%  | 95.0%  | TCAACGAGAAAAACA-----                                                         |
| 36        | AY348314.1  | SARS_coronavirus_Taiwan_TC3_complete_genome                                        | 77.0%   | 77.0%  | 77.0%  | 77.0%  | TCAACGAGAAAAACA-----                                                         |
| 37        | AY350750.1  | SARS_coronavirus_PUM01_complete_genome                                             | 95.7%   | 95.7%  | 95.7%  | 95.7%  | TCAACGAGAAAAACA-----                                                         |
| 38        | AY351680.1  | SARS_coronavirus_ZW1_complete_genome                                               | 100,000 | 100.0% | 100.0% | 100.0% | TCAACGAGAAAAACA-----                                                         |
| 39        | AY357075.1  | SARS_coronavirus_PUM02_complete_genome                                             | 95.3%   | 95.3%  | 95.3%  | 95.3%  | TCAACGAGAAAAACA-----                                                         |
| 40        | AY357076.1  | SARS_coronavirus_PUM03_complete_genome                                             | 95.3%   | 95.3%  | 95.3%  | 95.3%  | TCAACGAGAAAAACA-----                                                         |
| 41        | AY362698.1  | SARS_coronavirus_TW_C2_complete_genome                                             | 100,000 | 100.0% | 100.0% | 100.0% | TCAACGAGAAAAACA-----                                                         |
| 42        | AY362699.1  | SARS_coronavirus_TW_C3_complete_genome                                             | 100,000 | 100.0% | 100.0% | 100.0% | TCAACGAGAAAAACA-----                                                         |
| 43        | AY390556.1  | SARS_coronavirus_G202_complete_genome                                              | 100,000 | 100.0% | 100.0% | 100.0% | TCAACGAGAAAAACA-----                                                         |
| 44        | AY394850.1  | SARS_coronavirus_WH1_complete_genome                                               | 100,000 | 100.0% | 100.0% | 100.0% | TCAACGAGAAAAACA-----                                                         |
| 45        | AY394977.1  | SARS_coronavirus_G2-A_partial_genome                                               | 83.0%   | 83.0%  | 83.0%  | 83.0%  | TCAACGAGAAAAACA-----                                                         |
| 46        | AY394978.1  | SARS_coronavirus_G2-B_partial_genome                                               | 76.0%   | 76.0%  | 76.0%  | 76.0%  | TCAACGAGAAAAACA-----                                                         |
| 47        | AY394979.1  | SARS_coronavirus_G2-C_complete_genome                                              | 82.7%   | 82.7%  | 82.7%  | 82.7%  | TCAACGAGAAAAACA-----                                                         |
| 48        | AY394980.1  | SARS_coronavirus_G2-D_partial_genome                                               | 84.7%   | 84.7%  | 84.7%  | 84.7%  | TCAACGAGAAAAACA-----                                                         |
| 49        | AY394981.1  | SARS_coronavirus_H22-A_partial_genome                                              | 84.7%   | 84.7%  | 84.7%  | 84.7%  | TCAACGAGAAAAACA-----                                                         |
| 50        | AY394982.1  | SARS_coronavirus_H22B1-B_partial_genome                                            | 82.7%   | 82.7%  | 82.7%  | 82.7%  | TCAACGAGAAAAACA-----                                                         |
| 51        | AY394983.1  | SARS_coronavirus_H22-A_complete_genome                                             | 82.7%   | 82.7%  | 82.7%  | 82.7%  | TCAACGAGAAAAACA-----                                                         |
| 52        | AY394984.1  | SARS_coronavirus_H22-A_partial_genome                                              | 84.3%   | 84.3%  | 84.3%  | 84.3%  | TCAACGAGAAAAACA-----                                                         |
| 53        | AY394985.1  | SARS_coronavirus_H22-BB_complete_genome                                            | 16.7%   | 16.7%  | 16.7%  | 16.7%  | TCAACGAGAAAAACA-----                                                         |
| 54        | AY394986.1  | SARS_coronavirus_H22-CB_complete_genome                                            | 83.0%   | 83.0%  | 83.0%  | 83.0%  | TCAACGAGAAAAACA-----                                                         |
| 55        | AY394987.1  | SARS_coronavirus_H22-FB_complete_genome                                            | 86.0%   | 86.0%  | 86.0%  | 86.0%  | TCAACGAGAAAAACA-----                                                         |
| 56        | AY394988.1  | SARS_coronavirus_JMD_partial_genome                                                | 71.3%   | 71.0%  | 71.0%  | 71.0%  | TCAACGAGAAAAACA-----                                                         |
| 57        | AY394989.1  | SARS_coronavirus_H22-D_complete_genome                                             | 95.0%   | 95.0%  | 95.0%  | 95.0%  | TCAACGAGAAAAACA-----                                                         |
| 58        | AY394990.1  | SARS_coronavirus_H22-E_complete_genome                                             | 95.0%   | 95.0%  | 95.0%  | 95.0%  | TCAACGAGAAAAACA-----                                                         |
| 59        | AY394991.1  | SARS_coronavirus_H22-Fc_complete_genome                                            | 95.0%   | 95.0%  | 95.0%  | 95.0%  | TCAACGAGAAAAACA-----                                                         |
| 60        | AY394992.1  | SARS_coronavirus_H22-C-complete_genome                                             | 95.0%   | 95.0%  | 95.0%  | 95.0%  | TCAACGAGAAAAACA-----                                                         |
| 61        | AY394993.1  | SARS_coronavirus_H22B12-complete_genome                                            | 95.0%   | 95.0%  | 95.0%  | 95.0%  | TCAACGAGAAAAACA-----                                                         |
| 62        | AY394994.1  | SARS_coronavirus_H22-Bc-complete_genome                                            | 95.0%   | 95.0%  | 95.0%  | 95.0%  | TCAACGAGAAAAACA-----                                                         |
| 63        | AY394995.1  | SARS_coronavirus_H22-Cc-complete_genome                                            | 95.0%   | 95.0%  | 95.0%  | 95.0%  | TCAACGAGAAAAACA-----                                                         |
| 64        | AY394996.1  | SARS_coronavirus_ZS-B-complete_genome                                              | 95.0%   | 95.0%  | 95.0%  | 95.0%  | TCAACGAGAAAAACA-----                                                         |
| 65        | AY394997.1  | SARS_coronavirus_ZS-A-complete_genome                                              | 95.0%   | 95.0%  | 95.0%  | 95.0%  | TCAACGAGAAAAACA-----                                                         |
| 66        | AY394998.1  | SARS_coronavirus_LC1-complete_genome                                               | 95.0%   | 95.0%  | 95.0%  | 95.0%  | TCAACGAGAAAAACA-----                                                         |
| 67        | AY394999.1  | SARS_coronavirus_LC2-complete_genome                                               | 95.0%   | 95.0%  | 95.0%  | 95.0%  | TCAACGAGAAAAACA-----                                                         |
| 68        | AY395000.1  | SARS_coronavirus_LC3-complete_genome                                               | 95.0%   | 95.0%  | 95.0%  | 95.0%  | TCAACGAGAAAAACA-----                                                         |
| 69        | AY395001.1  | SARS_coronavirus_LC4-complete_genome                                               | 95.0%   | 95.0%  | 95.0%  | 95.0%  | TCAACGAGAAAAACA-----                                                         |
| 70        | AY395002.1  | SARS_coronavirus_LC5-complete_genome                                               | 95.0%   | 95.0%  | 95.0%  | 95.0%  | TCAACGAGAAAAACA-----                                                         |
| 71        | AY395003.1  | SARS_coronavirus_ZS-C-complete_genome                                              | 83.0%   | 83.0%  | 83.0%  | 83.0%  | TCAACGAGAAAAACA-----                                                         |
| 72        | AY395004.1  | SARS_coronavirus_H22-BB_partial_genome                                             | 84.3%   | 84.3%  | 84.3%  | 84.3%  | TCAACGAGAAAAACA-----                                                         |
| 73        | AY427439.1  | SARS_coronavirus_AS-complete_genome                                                | 94.7%   | 94.7%  | 94.7%  | 94.7%  | TCAACGAGAAAAACA-----                                                         |
| 74        | AY461660.1  | SARS_coronavirus_SoD-complete_genome                                               | 95.0%   | 95.0%  | 95.0%  | 95.0%  | TCAACGAGAAAAACA-----                                                         |
| 75        | AY463059.1  | SARS_coronavirus_ShanghaiQXC1-complete_genome                                      | 73.7%   | 73.7%  | 73.7%  | 73.7%  | TCAACGAGAAAAACA-----                                                         |
| 76        | AY463060.1  | SARS_coronavirus_ShanghaiQXC2-complete_genome                                      | 73.7%   | 73.7%  | 73.7%  | 73.7%  | TCAACGAGAAAAACA-----                                                         |
| 77        | AY485277.1  | SARS_coronavirus_Sin11-01-complete_genome                                          | 100,000 | 100.0% | 100.0% | 100.0% | TCAACGAGAAAAACA-----                                                         |
| 78        | AY485278.1  | SARS_coronavirus_Sin03-11-complete_genome                                          | 100,000 | 100.0% | 100.0% | 100.0% | TCAACGAGAAAAACA-----                                                         |
| 79        | AY502923.1  | SARS_coronavirus_TW10-complete_genome                                              | 100,000 | 100.0% | 100.0% | 100.0% | TCAACGAGAAAAACA-----                                                         |
| 80        | AY502924.1  | SARS_coronavirus_TW11-complete_genome                                              | 100,000 | 100.0% | 100.0% | 100.0% | TCAACGAGAAAAACA-----                                                         |
| 81        | AY502925.1  | SARS_coronavirus_TW2-complete_genome                                               | 100,000 | 100.0% | 100.0% | 100.0% | TCAACGAGAAAAACA-----                                                         |
| 82        | AY502926.1  | SARS_coronavirus_TW3-complete_genome                                               | 100,000 | 100.0% | 100.0% | 100.0% | TCAACGAGAAAAACA-----                                                         |
| 83        | AY502927.1  | SARS_coronavirus_TW4-complete_genome                                               | 100,000 | 100.0% | 100.0% | 100.0% | TCAACGAGAAAAACA-----                                                         |
| 84        | AY502928.1  | SARS_coronavirus_TW5-complete_genome                                               | 100,000 | 100.0% | 100.0% | 100.0% | TCAACGAGAAAAACA-----                                                         |
| 85        | AY502929.1  | SARS_coronavirus_TW6-complete_genome                                               | 100,000 | 100.0% | 100.0% | 100.0% | TCAACGAGAAAAACA-----                                                         |
| 86        | AY502930.1  | SARS_coronavirus_TW7-complete_genome                                               | 100,000 | 100.0% | 100.0% | 100.0% | TCAACGAGAAAAACA-----                                                         |
| 87        | AY502931.1  | SARS_coronavirus_TW8-complete_genome                                               | 100,000 | 100.0% | 100.0% | 100.0% | TCAACGAGAAAAACA-----                                                         |
| 88        | AY502932.1  | SARS_coronavirus_TW9-complete_genome                                               | 100,000 | 100.0% | 100.0% | 100.0% | TCAACGAGAAAAACA-----                                                         |
| 89        | AY508704.1  | SARS_coronavirus_SNS1-complete_genome                                              | 94.7%   | 94.7%  | 94.7%  | 94.7%  | TCAACGAGAAAAACA-----                                                         |
| 90        | AY559081.1  | SARS_coronavirus_Sin842-complete_genome                                            | 95.7%   | 95.3%  | 95.3%  | 95.3%  | TCAACGAGAAAAACA-----                                                         |
| 91        | AY559082.1  | SARS_coronavirus_Sin852-complete_genome                                            | 99.7%   | 96.3%  | 96.3%  | 96.3%  | TCAACGAGAAAAACA-----                                                         |
| 92        | AY559083.1  | SARS_coronavirus_Sin3408-complete_genome                                           | 88.7%   | 85.3%  | 85.3%  | 85.3%  | TCAACGAGAAAAACA-----                                                         |
| 93        | AY559084.1  | SARS_coronavirus_Sin765V-complete_genome                                           | 94.7%   | 94.7%  | 94.7%  | 94.7%  | TCAACGAGAAAAACA-----                                                         |
| 94        | AY559085.1  | SARS_coronavirus_Sin848-complete_genome                                            | 94.7%   | 94.7%  | 94.7%  | 94.7%  | TCAACGAGAAAAACA-----                                                         |
| 95        | AY559086.1  | SARS_coronavirus_Sin849-complete_genome                                            | 94.7%   | 94.7%  | 94.7%  | 94.7%  | TCAACGAGAAAAACA-----                                                         |
| 96        | AY559087.1  | SARS_coronavirus_Sin3725V-complete_genome                                          | 94.7%   | 94.7%  | 94.7%  | 94.7%  | TCAACGAGAAAAACA-----                                                         |
| 97        | AY559088.1  | SARS_coronavirus_SinP1-complete_genome                                             | 94.7%   | 94.7%  | 94.7%  | 94.7%  | TCAACGAGAAAAACA-----                                                         |
| 98        | AY559089.1  | SARS_coronavirus_SinP2-complete_genome                                             | 94.7%   | 94.7%  | 94.7%  | 94.7%  | TCAACGAGAAAAACA-----                                                         |
| 99        | AY559090.1  | SARS_coronavirus_SinP3-complete_genome                                             | 95.3%   | 92.7%  | 92.7%  | 92.7%  | TCAACGAGAAAAACA-----                                                         |
| 100       | AY559091.1  | SARS_coronavirus_SinP4-complete_genome                                             | 94.7%   | 94.7%  | 94.7%  | 94.7%  | TCAACGAGAAAAACA-----                                                         |
| 101       | AY559092.1  | SARS_coronavirus_SinP5-complete_genome                                             | 94.7%   | 94.7%  | 94.7%  | 94.7%  | TCAACGAGAAAAACA-----                                                         |
| 102       | AY559093.1  | SARS_coronavirus_Sin845-complete_genome                                            | 94.7%   | 94.7%  | 94.7%  | 94.7%  | TCAACGAGAAAAACA-----                                                         |
| 103       | AY559094.1  | SARS_coronavirus_Sin846-complete_genome                                            | 94.7%   | 94.7%  | 94.7%  | 94.7%  | TCAACGAGAAAAACA-----                                                         |
| 104       | AY559095.1  | SARS_coronavirus_Sin847-complete_genome                                            | 96.7%   | 96.0%  | 96.0%  | 96.0%  | TCAACGAGAAAAACA-----                                                         |
| 105       | AY559096.1  | SARS_coronavirus_Sin850-complete_genome                                            | 97.3%   | 95.7%  | 95.7%  | 95.7%  | TCAACGAGAAAAACA-----                                                         |
| 106       | AY559097.1  | SARS_coronavirus_Sin3408L-complete_genome                                          | 94.7%   | 94.7%  | 94.7%  | 94.7%  | TCAACGAGAAAAACA-----                                                         |
| 107       | AY595412.1  | SARS_coronavirus_LLJ-2004-complete_genome                                          | 93.0%   | 93.0%  | 93.0%  | 93.0%  | TCAACGAGAAAAACA-----                                                         |
| 108       | AY654624.1  | SARS_coronavirus_TJF-complete_genome                                               | 99.7%   | 99.0%  | 99.0%  | 99.0%  | TCAACGAGAAAAACA-----                                                         |
| 109       | AY714217.1  | SARS_coronavirus_CPC120301157-complete_genome                                      | 100,000 | 100.0% | 100.0% | 100.0% | TCAACGAGAAAAACA-----                                                         |
| 110       | CQ903009.1  | Sequence_13_from_Patent_WO2004094667                                               | 100,000 | 99.7%  | 99.7%  | 99.7%  | TCAACGAGAAAAACA-----                                                         |
| 111       | CQ918584.1  | Sequence                                                                           |         |        |        |        |                                                                              |



|     |                                                           |        |        |       |
|-----|-----------------------------------------------------------|--------|--------|-------|
| 69  | AY395001.1_SARS_coronavirus_LC4_complete_genome           | 95.0%  | 95.0%  | ----- |
| 70  | AY395002.1_SARS_coronavirus_LC5_complete_genome           | 95.0%  | 95.0%  | ----- |
| 71  | AY395003.1_SARS_coronavirus_ZS-C_complete_genome          | 83.0%  | 83.0%  | ----- |
| 72  | AY395004.1_SARS_coronavirus_HSZ2-Bb_partial_genome        | 84.3%  | 84.3%  | ----- |
| 73  | AY427439.1_SARS_coronavirus_AS_complete_genome            | 94.7%  | 94.7%  | ----- |
| 74  | AY461660.1_SARS_coronavirus_SoD_complete_genome           | 95.0%  | 94.7%  | ----- |
| 75  | AY463059.1_SARS_coronavirus_ShanghaiQXC1_complete_genome  | 73.7%  | 73.7%  | ----- |
| 76  | AY463060.1_SARS_coronavirus_ShanghaiQXC2_complete_genome  | 73.7%  | 73.7%  | ----- |
| 77  | AY485277.1_SARS_coronavirus_Sin01-11_complete_genome      | 100.0% | 100.0% | ----- |
| 78  | AY485278.1_SARS_coronavirus_Sin03-11_complete_genome      | 100.0% | 100.0% | ----- |
| 79  | AY502923.1_SARS_coronavirus_TW10_complete_genome          | 100.0% | 100.0% | ----- |
| 80  | AY502924.1_SARS_coronavirus_TW11_complete_genome          | 100.0% | 100.0% | ----- |
| 81  | AY502925.1_SARS_coronavirus_TW2_complete_genome           | 100.0% | 100.0% | ----- |
| 82  | AY502926.1_SARS_coronavirus_TW3_complete_genome           | 100.0% | 100.0% | ----- |
| 83  | AY502927.1_SARS_coronavirus_TW4_complete_genome           | 100.0% | 100.0% | ----- |
| 84  | AY502928.1_SARS_coronavirus_TW5_complete_genome           | 100.0% | 100.0% | ----- |
| 85  | AY502929.1_SARS_coronavirus_TW6_complete_genome           | 100.0% | 100.0% | ----- |
| 86  | AY502930.1_SARS_coronavirus_TW7_complete_genome           | 100.0% | 100.0% | ----- |
| 87  | AY502931.1_SARS_coronavirus_TW8_complete_genome           | 100.0% | 100.0% | ----- |
| 88  | AY502932.1_SARS_coronavirus_TW9_complete_genome           | 100.0% | 100.0% | ----- |
| 89  | AY508724.1_SARS_coronavirus_NS-1_complete_genome          | 94.7%  | 94.7%  | ----- |
| 90  | AY559081.1_SARS_coronavirus_Sin842_complete_genome        | 95.7%  | 95.3%  | ----- |
| 91  | AY559082.1_SARS_coronavirus_Sin852_complete_genome        | 99.7%  | 96.3%  | ----- |
| 92  | AY559083.1_SARS_coronavirus_Sin408_complete_genome        | 88.7%  | 85.3%  | ----- |
| 93  | AY559084.1_SARS_coronavirus_Sin3765V_complete_genome      | 94.7%  | 94.7%  | ----- |
| 94  | AY559085.1_SARS_coronavirus_Sin848_complete_genome        | 94.7%  | 94.7%  | ----- |
| 95  | AY559086.1_SARS_coronavirus_Sin849_complete_genome        | 94.7%  | 94.7%  | ----- |
| 96  | AY559087.1_SARS_coronavirus_Sin3725V_complete_genome      | 94.7%  | 94.7%  | ----- |
| 97  | AY559088.1_SARS_coronavirus_SinP1_complete_genome         | 94.7%  | 94.7%  | ----- |
| 98  | AY559089.1_SARS_coronavirus_SinP2_complete_genome         | 94.7%  | 94.7%  | ----- |
| 99  | AY559090.1_SARS_coronavirus_SinP3_complete_genome         | 95.3%  | 92.7%  | ----- |
| 100 | AY559091.1_SARS_coronavirus_SinP4_complete_genome         | 94.7%  | 94.7%  | ----- |
| 101 | AY559092.1_SARS_coronavirus_SinP5_complete_genome         | 94.7%  | 94.7%  | ----- |
| 102 | AY559093.1_SARS_coronavirus_Sin845_complete_genome        | 94.7%  | 94.7%  | ----- |
| 103 | AY559094.1_SARS_coronavirus_Sin846_complete_genome        | 94.7%  | 94.7%  | ----- |
| 104 | AY559095.1_SARS_coronavirus_Sin847_complete_genome        | 96.7%  | 96.0%  | ----- |
| 105 | AY559096.1_SARS_coronavirus_Sin850_complete_genome        | 97.3%  | 95.7%  | ----- |
| 106 | AY559097.1_SARS_coronavirus_Sin3408L_complete_genome      | 94.7%  | 94.7%  | ----- |
| 107 | AY594412.1_SARS_coronavirus_LiJ-2004_complete_genome      | 93.0%  | 93.0%  | ----- |
| 108 | AY654624.1_SARS_coronavirus_TJF_complete_genome           | 99.7%  | 99.0%  | ----- |
| 109 | AY714217.1_SARS_Coronavirus_CDC_200301157_complete_genome | 100.0% | 100.0% | ----- |
| 110 | CQ903009.1_Sequence_13_from_Patent_WO2004094667           | 100.0% | 99.7%  | ----- |
| 111 | CQ918584.1_Sequence_1_from_Patent_WO2004096842            | 95.0%  | 95.0%  | ----- |
| 112 | CQ918595.1_Sequence_2_from_Patent_WO2004096842            | 95.0%  | 95.0%  | ----- |
| 113 | CQ918598.1_Sequence_15_from_Patent_WO2004096842           | 100.0% | 100.0% | ----- |
| 114 | NC_004718.3_SARS_coronavirus_complete_genome              | 100.0% | 100.0% | ----- |
|     | consensus/100%                                            |        |        | ----- |
|     | consensus/90%                                             |        |        | ----- |
|     | consensus/80%                                             |        |        | ----- |
|     | consensus/70%                                             |        |        | ----- |

|     |                                                                                               |        |        |       |                          |  |  |       |
|-----|-----------------------------------------------------------------------------------------------|--------|--------|-------|--------------------------|--|--|-------|
|     |                                                                                               | cov    | pid    | 561   |                          |  |  | 584   |
| 1   | AP006557.1_SARS_coronavirus_TWH_genomic_RNA_complete_genome                                   | 100.0% | 100.0% | ----- |                          |  |  | ----- |
| 2   | AP006558.1_SARS_coronavirus_TWJ_genomic_RNA_complete_genome                                   | 100.0% | 100.0% | ----- |                          |  |  | ----- |
| 3   | AP006559.1_SARS_coronavirus_TWK_genomic_RNA_complete_genome                                   | 100.0% | 100.0% | ----- |                          |  |  | ----- |
| 4   | AP006560.1_SARS_coronavirus_TWS_genomic_RNA_complete_genome                                   | 100.0% | 100.0% | ----- |                          |  |  | ----- |
| 5   | AP006561.1_SARS_coronavirus_TWY_genomic_RNA_complete_genome                                   | 100.0% | 100.0% | ----- |                          |  |  | ----- |
| 6   | AY274119.3_Severe_acute_respiratory_syndrome-related_coronavirus_isolate_Tor2_complete_genome | 100.0% | 100.0% | ----- |                          |  |  | ----- |
| 7   | AY278487.1_SARS_coronavirus_B01_complete_genome                                               | 100.0% | 100.0% | ----- |                          |  |  | ----- |
| 8   | AY278488.2_SARS_coronavirus_B01_complete_genome                                               | 93.7%  | 93.7%  | ----- |                          |  |  | ----- |
| 9   | AY278489.2_SARS_coronavirus_GD01_complete_genome                                              | 94.7%  | 94.7%  | ----- |                          |  |  | ----- |
| 10  | AY278490.3_SARS_coronavirus_B03_complete_genome                                               | 98.7%  | 98.7%  | ----- |                          |  |  | ----- |
| 11  | AY278491.2_SARS_coronavirus_HKU-39849_complete_genome                                         | 100.0% | 100.0% | ----- |                          |  |  | ----- |
| 12  | AY278544.1_SARS_coronavirus_CUH-K1_complete_genome                                            | 95.0%  | 95.0%  | ----- |                          |  |  | ----- |
| 13  | AY278741.1_SARS_coronavirus_Urbani_complete_genome                                            | 100.0% | 100.0% | ----- |                          |  |  | ----- |
| 14  | AY279354.2_SARS_coronavirus_B04_complete_genome                                               | 94.7%  | 94.7%  | ----- |                          |  |  | ----- |
| 15  | AY282752.2_SARS_coronavirus_CUH-K-Su10_complete_genome                                        | 95.0%  | 95.0%  | ----- |                          |  |  | ----- |
| 16  | AY283794.1_SARS_coronavirus_Sin2500_complete_genome                                           | 94.7%  | 94.7%  | ----- |                          |  |  | ----- |
| 17  | AY283795.1_SARS_coronavirus_Sin2677_complete_genome                                           | 94.7%  | 94.7%  | ----- |                          |  |  | ----- |
| 18  | AY283796.1_SARS_coronavirus_Sin2679_complete_genome                                           | 94.7%  | 94.7%  | ----- |                          |  |  | ----- |
| 19  | AY283797.1_SARS_coronavirus_Sin2748_complete_genome                                           | 94.7%  | 94.7%  | ----- |                          |  |  | ----- |
| 20  | AY283798.2_SARS_coronavirus_Sin2774_complete_genome                                           | 94.7%  | 94.7%  | ----- |                          |  |  | ----- |
| 21  | AY291315.1_SARS_coronavirus_Frankfurt_1_complete_genome                                       | 100.0% | 100.0% | ----- |                          |  |  | ----- |
| 22  | AY291451.1_SARS_coronavirus_TW1_complete_genome                                               | 100.0% | 100.0% | ----- |                          |  |  | ----- |
| 23  | AY297028.1_SARS_coronavirus_Z01_complete_genome                                               | 95.3%  | 95.3%  | ----- |                          |  |  | ----- |
| 24  | AY304486.1_SARS_coronavirus_S23_complete_genome                                               | 95.0%  | 95.0%  | ----- |                          |  |  | ----- |
| 25  | AY304488.1_SARS_coronavirus_S216_complete_genome                                              | 95.0%  | 95.0%  | ----- |                          |  |  | ----- |
| 26  | AY304495.1_SARS_coronavirus_G250_complete_genome                                              | 95.0%  | 95.0%  | ----- |                          |  |  | ----- |
| 27  | AY310100.1_SARS_coronavirus_FNA_complete_genome                                               | 100.0% | 100.0% | ----- |                          |  |  | ----- |
| 28  | AY313906.1_SARS_coronavirus_GD69_complete_genome                                              | 100.0% | 100.0% | ----- |                          |  |  | ----- |
| 29  | AY321118.1_SARS_coronavirus_TWC_complete_genome                                               | 100.0% | 100.0% | ----- |                          |  |  | ----- |
| 30  | AY323977.2_SARS_coronavirus_HSR_1_complete_genome                                             | 100.0% | 100.0% | ----- |                          |  |  | ----- |
| 31  | AY338174.1_SARS_coronavirus_Taiwan_TC1_complete_genome                                        | 77.0%  | 77.0%  | ----- |                          |  |  | ----- |
| 32  | AY338175.1_SARS_coronavirus_Taiwan_TC2_complete_genome                                        | 77.0%  | 77.0%  | ----- |                          |  |  | ----- |
| 33  | AY345986.1_SARS_coronavirus_CUH-K-AG01_complete_genome                                        | 95.0%  | 95.0%  | ----- |                          |  |  | ----- |
| 34  | AY345987.1_SARS_coronavirus_CUH-K-AG02_complete_genome                                        | 95.0%  | 95.0%  | ----- |                          |  |  | ----- |
| 35  | AY345988.1_SARS_coronavirus_CUH-K-AG03_complete_genome                                        | 95.0%  | 95.0%  | ----- |                          |  |  | ----- |
| 36  | AY348314.1_SARS_coronavirus_Taiwan_TC3_complete_genome                                        | 77.0%  | 77.0%  | ----- |                          |  |  | ----- |
| 37  | AY350750.1_SARS_coronavirus_PUMC01_complete_genome                                            | 95.7%  | 95.7%  | ----- |                          |  |  | ----- |
| 38  | AY351680.1_SARS_coronavirus_ZMY_1_complete_genome                                             | 100.0% | 99.7%  | ----- |                          |  |  | ----- |
| 39  | AY357075.1_SARS_coronavirus_PUMC02_complete_genome                                            | 95.3%  | 95.3%  | ----- |                          |  |  | ----- |
| 40  | AY357076.1_SARS_coronavirus_PUMC03_complete_genome                                            | 95.3%  | 95.3%  | ----- |                          |  |  | ----- |
| 41  | AY362698.1_SARS_coronavirus_TW2_complete_genome                                               | 100.0% | 100.0% | ----- |                          |  |  | ----- |
| 42  | AY362699.1_SARS_coronavirus_TW3_complete_genome                                               | 100.0% | 100.0% | ----- |                          |  |  | ----- |
| 43  | AY390556.1_SARS_coronavirus_G202_complete_genome                                              | 100.0% | 100.0% | ----- |                          |  |  | ----- |
| 44  | AY394850.2_SARS_coronavirus_WUO_complete_genome                                               | 100.0% | 100.0% | ----- |                          |  |  | ----- |
| 45  | AY394977.1_SARS_coronavirus_G2-A_partial_genome                                               | 83.0%  | 83.0%  | ----- |                          |  |  | ----- |
| 46  | AY394978.1_SARS_coronavirus_G2-B_partial_genome                                               | 76.0%  | 76.0%  | ----- |                          |  |  | ----- |
| 47  | AY394979.1_SARS_coronavirus_G2-C_partial_genome                                               | 82.7%  | 82.7%  | ----- |                          |  |  | ----- |
| 48  | AY394980.1_SARS_coronavirus_G2-D_partial_genome                                               | 84.7%  | 84.3%  | ----- |                          |  |  | ----- |
| 49  | AY394981.1_SARS_coronavirus_HGZBL1-A_partial_genome                                           | 83.0%  | 83.0%  | ----- |                          |  |  | ----- |
| 50  | AY394982.1_SARS_coronavirus_HGZBL1-B_partial_genome                                           | 82.7%  | 82.7%  | ----- |                          |  |  | ----- |
| 51  | AY394983.1_SARS_coronavirus_HGZ2-A_complete_genome                                            | 82.7%  | 82.7%  | ----- |                          |  |  | ----- |
| 52  | AY394984.1_SARS_coronavirus_HSZ-A_partial_genome                                              | 84.3%  | 84.3%  | ----- |                          |  |  | ----- |
| 53  | AY394985.1_SARS_coronavirus_HSZ-Bb_partial_genome                                             | 16.7%  | 16.7%  | ----- | TGGTTCGAGAAATGGACGCGATTC |  |  | ----- |
| 54  | AY394986.1_SARS_coronavirus_HSZ-Cb_partial_genome                                             | 83.0%  | 83.0%  | ----- |                          |  |  | ----- |
| 55  | AY394987.1_SARS_coronavirus_HSZ2-Fb_partial_genome                                            | 86.0%  | 86.0%  | ----- |                          |  |  | ----- |
| 56  | AY394988.1_SARS_coronavirus_JMD_partial_genome                                                | 71.3%  | 71.0%  | ----- |                          |  |  | ----- |
| 57  | AY394989.1_SARS_coronavirus_HZS-D_complete_genome                                             | 95.0%  | 95.0%  | ----- |                          |  |  | ----- |
| 58  | AY394990.1_SARS_coronavirus_HZS2-E_complete_genome                                            | 95.0%  | 95.0%  | ----- |                          |  |  | ----- |
| 59  | AY394991.1_SARS_coronavirus_HZS2-Fc_complete_genome                                           | 95.0%  | 95.0%  | ----- |                          |  |  | ----- |
| 60  | AY394992.1_SARS_coronavirus_HZS2-C_complete_genome                                            | 95.0%  | 95.0%  | ----- |                          |  |  | ----- |
| 61  | AY394993.1_SARS_coronavirus_HGZBL2_complete_genome                                            | 95.0%  | 95.0%  | ----- |                          |  |  | ----- |
| 62  | AY394994.1_SARS_coronavirus_HSZ-Bc_partial_genome                                             | 95.0%  | 95.0%  | ----- |                          |  |  | ----- |
| 63  | AY394995.1_SARS_coronavirus_HSZ-Cc_partial_genome                                             | 95.0%  | 95.0%  | ----- |                          |  |  | ----- |
| 64  | AY394996.1_SARS_coronavirus_ZS-B_complete_genome                                              | 95.0%  | 95.0%  | ----- |                          |  |  | ----- |
| 65  | AY394997.1_SARS_coronavirus_ZS-A_complete_genome                                              | 95.0%  | 95.0%  | ----- |                          |  |  | ----- |
| 66  | AY394998.1_SARS_coronavirus_LC1_complete_genome                                               | 95.0%  | 95.0%  | ----- |                          |  |  | ----- |
| 67  | AY394999.1_SARS_coronavirus_LC2_complete_genome                                               | 95.0%  | 95.0%  | ----- |                          |  |  | ----- |
| 68  | AY395000.1_SARS_coronavirus_LC3_complete_genome                                               | 95.0%  | 95.0%  | ----- |                          |  |  | ----- |
| 69  | AY395001.1_SARS_coronavirus_LC4_complete_genome                                               | 95.0%  | 95.0%  | ----- |                          |  |  | ----- |
| 70  | AY395002.1_SARS_coronavirus_LC5_complete_genome                                               | 95.0%  | 95.0%  | ----- |                          |  |  | ----- |
| 71  | AY395003.1_SARS_coronavirus_ZS-C_complete_genome                                              | 83.0%  | 83.0%  | ----- |                          |  |  | ----- |
| 72  | AY395004.1_SARS_coronavirus_HSZ2-Bb_partial_genome                                            | 84.3%  | 84.3%  | ----- |                          |  |  | ----- |
| 73  | AY427439.1_SARS_coronavirus_AS_complete_genome                                                | 94.7%  | 94.7%  | ----- |                          |  |  | ----- |
| 74  | AY461660.1_SARS_coronavirus_SoD_complete_genome                                               | 95.0%  | 94.7%  | ----- |                          |  |  | ----- |
| 75  | AY463059.1_SARS_coronavirus_ShanghaiQXC1_complete_genome                                      | 73.7%  | 73.7%  | ----- |                          |  |  | ----- |
| 76  | AY463060.1_SARS_coronavirus_ShanghaiQXC2_complete_genome                                      | 73.7%  | 73.7%  | ----- |                          |  |  | ----- |
| 77  | AY485277.1_SARS_coronavirus_Sin01-11_complete_genome                                          | 100.0% | 100.0% | ----- |                          |  |  | ----- |
| 78  | AY485278.1_SARS_coronavirus_Sin03-11_complete_genome                                          | 100.0% | 100.0% | ----- |                          |  |  | ----- |
| 79  | AY502923.1_SARS_coronavirus_TW10_complete_genome                                              | 100.0% | 100.0% | ----- |                          |  |  | ----- |
| 80  | AY502924.1_SARS_coronavirus_TW11_complete_genome                                              | 100.0% | 100.0% | ----- |                          |  |  | ----- |
| 81  | AY502925.1_SARS_coronavirus_TW2_complete_genome                                               | 100.0% | 100.0% | ----- |                          |  |  | ----- |
| 82  | AY502926.1_SARS_coronavirus_TW3_complete_genome                                               | 100.0% | 100.0% | ----- |                          |  |  | ----- |
| 83  | AY502927.1_SARS_coronavirus_TW4_complete_genome                                               | 100.0% | 100.0% | ----- |                          |  |  | ----- |
| 84  | AY502928.1_SARS_coronavirus_TW5_complete_genome                                               | 100.0% | 100.0% | ----- |                          |  |  | ----- |
| 85  | AY502929.1_SARS_coronavirus_TW6_complete_genome                                               | 100.0% | 100.0% | ----- |                          |  |  | ----- |
| 86  | AY502930.1_SARS_coronavirus_TW7_complete_genome                                               | 100.0% | 100.0% | ----- |                          |  |  | ----- |
| 87  | AY502931.1_SARS_coronavirus_TW8_complete_genome                                               | 100.0% | 100.0% | ----- |                          |  |  | ----- |
| 88  | AY502932.1_SARS_coronavirus_TW9_complete_genome                                               | 100.0% | 100.0% | ----- |                          |  |  | ----- |
| 89  | AY508724.1_SARS_coronavirus_NS-1_complete_genome                                              | 94.7%  | 94.7%  | ----- |                          |  |  | ----- |
| 90  | AY559081.1_SARS_coronavirus_Sin842_complete_genome                                            | 95.7%  | 95.3%  | ----- |                          |  |  | ----- |
| 91  | AY559082.1_SARS_coronavirus_Sin852_complete_genome                                            | 99.7%  | 96.3%  | ----- |                          |  |  | ----- |
| 92  | AY559083.1_SARS_coronavirus_Sin408_complete_genome                                            | 88.7%  | 85.3%  | ----- |                          |  |  | ----- |
| 93  | AY559084.1_SARS_coronavirus_Sin3765V_complete_genome                                          | 94.7%  | 94.7%  | ----- |                          |  |  | ----- |
| 94  | AY559085.1_SARS_coronavirus_Sin848_complete_genome                                            | 94.7%  | 94.7%  | ----- |                          |  |  | ----- |
| 95  | AY559086.1_SARS_coronavirus_Sin849_complete_genome                                            | 94.7%  | 94.7%  | ----- |                          |  |  | ----- |
| 96  | AY559087.1_SARS_coronavirus_Sin3725V_complete_genome                                          | 94.7%  | 94.7%  | ----- |                          |  |  | ----- |
| 97  | AY559088.1_SARS_coronavirus_SinP1_complete_genome                                             | 94.7%  | 94.7%  | ----- |                          |  |  | ----- |
| 98  | AY559089.1_SARS_coronavirus_SinP2_complete_genome                                             | 94.7%  | 94.7%  | ----- |                          |  |  | ----- |
| 99  | AY559090.1_SARS_coronavirus_SinP3_complete_genome                                             | 95.3%  | 92.7%  | ----- |                          |  |  | ----- |
| 100 | AY559091.1_SARS_coronavirus_SinP4_complete_genome                                             | 94.7%  | 94.7%  | ----- |                          |  |  | ----- |
| 101 | AY559092.1_SARS_coronavirus_SinP5_complete_genome                                             | 94.7%  | 94.7%  | ----- |                          |  |  | ----- |
| 102 | AY559093.1_SARS_coronavirus_Sin845_complete_genome                                            | 94.7%  | 94.7%  | ----- |                          |  |  | ----- |
| 103 | AY559094.1_SARS_coronavirus_Sin846_complete_genome                                            | 94.7%  | 94.7%  | ----- |                          |  |  | ----- |
| 104 | AY559095.1_SARS_coronavirus_Sin847_complete_genome                                            | 96.7%  | 96.0%  | ----- |                          |  |  | ----- |
| 105 | AY559096.1_SARS_coronavirus_Sin850_complete_genome                                            | 97.3%  | 95.7%  | ----- |                          |  |  | ----- |
| 106 | AY559097.1_SARS_coronavirus_Sin3408L_complete_genome                                          | 94.7%  | 94.7%  | ----- |                          |  |  | ----- |
| 107 | AY594412.1_SARS_coronavirus_LiJ-2004_complete_genome                                          | 93.0%  | 93.0%  | ----- |                          |  |  | ----- |

|                                                               |        |        |       |
|---------------------------------------------------------------|--------|--------|-------|
| 108 AY654624.1_SARS_coronavirus_TJF_complete_genome           | 99.7%  | 99.0%  | ----- |
| 109 AY714217.1_SARS_Coronavirus_CDC*200301157_complete_genome | 100.0% | 100.0% | ----- |
| 110 CQ903009.1_Sequence_13_from_Patent_WO2004094667           | 100.0% | 99.7%  | ----- |
| 111 CQ918584.1_Sequence_1_from_Patent_WO2004096842            | 95.0%  | 95.0%  | ----- |
| 112 CQ918585.1_Sequence_2_from_Patent_WO2004096842            | 95.0%  | 95.0%  | ----- |
| 113 CQ918598.1_Sequence_15_from_Patent_WO2004096842           | 100.0% | 100.0% | ----- |
| 114 NC_004718.3_SARS_coronavirus_complete_genome              | 100.0% | 100.0% | ----- |
| consensus/100%                                                |        |        | ..... |
| consensus/90%                                                 |        |        | ..... |
| consensus/80%                                                 |        |        | ..... |
| consensus/70%                                                 |        |        | ..... |

[MView 1.63](#), Copyright © 1997-2018 [Nigel P. Brown](#)

Reference sequence (1): hCoV-19/Algeria/G0638\_2264/2020|EPI\_ISL\_418241|2020-03-02  
Identities normalised by aligned length.  
Colored by: identity

Table with columns: cov, pid, and sequence alignment. Rows list various countries and dates, such as hCoV-19/Algeria/G0638\_2264/2020, hCoV-19/Australia/NSW01/2020, etc.

consensus/100% consensus/90% consensus/80% consensus/70%

Table with columns: cov, pid, and sequence alignment. This section shows the alignment for the second reference sequence (81) and includes the same country/date entries as the first table.

Table with columns: 1, and sequence alignment. This section shows the alignment for the first reference sequence (1) and includes the same country/date entries as the first table.

consensus/100% consensus/90% consensus/80% consensus/70%

Table with columns: 1, and sequence alignment. This section shows the alignment for the second reference sequence (81) and includes the same country/date entries as the first table.



|    |                                                                      |       |       |                   |
|----|----------------------------------------------------------------------|-------|-------|-------------------|
| 12 | hCoV-19/Chongqing/IVDC-CQ-001/2020 EPI_ISL_408481 2020-01-18         | 81.4% | 82.0% | CTAGGTTTCGTCGCGG  |
| 13 | hCoV-19/Congo/108/2020 EPI_ISL_417948 2020-03-19                     | 85.1% | 82.1% | CTAGGTTTTCGTCGCGG |
| 14 | hCoV-19/Denmark/SSI-01/2020 EPI_ISL_416142 2020-02-26                | 91.7% | 90.2% | CTAGGTTTTCGTCGCGG |
| 15 | hCoV-19/England/01/2020 EPI_ISL_407071 2020-01-29                    | 85.1% | 82.0% | CTAGGTTTTCGTCGCGG |
| 16 | hCoV-19/Finland/1/2020 EPI_ISL_407079 2020-01-29                     | 88.4% | 84.9% | CTAGGTTTTCGTCGCGG |
| 17 | hCoV-19/Foshan/20SF207/2020 EPI_ISL_406534 2020-01-22                | 90.9% | 89.0% | CTAGGTTTTCGTCGCGG |
| 18 | hCoV-19/France/ARA094100/2020 EPI_ISL_418412 2020-03-15              | 85.5% | 84.8% | CTAGGTTTTCGTCGCGG |
| 19 | hCoV-19/Fujian/13/2020 EPI_ISL_411066 2020-01-22                     | 83.5% | 80.1% | CTAGGTTTTCGTCGCGG |
| 20 | hCoV-19/Gaetgia/Tb/2020 EPI_ISL_416482 2020-03-13                    | 84.3% | 81.6% | CTAGGTTTTCGTCGCGG |
| 21 | hCoV-19/Germany/Baden-Wuerttemberg-1/2020 EPI_ISL_412912 2020-02-25  | 95.0% | 99.1% | CTAGGTTTTCGTCGCGG |
| 22 | hCoV-19/Germany/BavPat1/2020 EPI_ISL_406862 2020-01-28               | 97.9% | 96.7% | CTAGGTTTTCGTCGCGG |
| 23 | hCoV-19/Germany/NRW-01/2020 EPI_ISL_413488 2020-02-28                | 97.9% | 95.9% | CTAGGTTTTCGTCGCGG |
| 24 | hCoV-19/Greece/10/2020 EPI_ISL_418263 2020-03-18                     | 83.5% | 80.5% | CTAGGTTTTCGTCGCGG |
| 25 | hCoV-19/Guangdong/2020XN4243-P0035/2020 EPI_ISL_413853 2020-01-30    | 85.5% | 88.0% | CTAGGTTTTCGTCGCGG |
| 26 | hCoV-19/Guangzhou/20SF206/2020 EPI_ISL_406533 2020-01-22             | 89.7% | 88.9% | CTAGGTTTTCGTCGCGG |
| 27 | hCoV-19/Hangzhou/HZ-1/2020 EPI_ISL_406970 2020-01-20                 | 83.1% | 81.0% | CTAGGTTTTCGTCGCGG |
| 28 | hCoV-19/Hefei/2/2020 EPI_ISL_412026 2020-02-23                       | 84.3% | 80.2% | CTAGGTTTTCGTCGCGG |
| 29 | hCoV-19/Hong_Kong/Casell_21012020/2020 EPI_ISL_417176 2020-01-21     | 97.5% | 99.6% | CTAGGTTTTCGTCGCGG |
| 30 | hCoV-19/Hungary/2/2020 EPI_ISL_418183 2020-03-17                     | 97.9% | 94.4% | CTAGGTTTTCGTCGCGG |
| 31 | hCoV-19/Iceland/1/2020 EPI_ISL_417535 2020-03-13                     | 87.2% | 84.1% | CTAGGTTTTCGTCGCGG |
| 32 | hCoV-19/India/1-31/2020 EPI_ISL_413523 2020-01-31                    | 91.3% | 88.0% | CTAGGTTTTCGTCGCGG |
| 33 | hCoV-19/Ireland/21023/2020 EPI_ISL_418516 2020-03-06                 | 81.8% | 78.1% | CTAGGTTTTCGTCGCGG |
| 34 | hCoV-19/Israel/ISR_IT0320/2020 EPI_ISL_419210 2020-03                | 79.8% | 78.5% | CTAGGTTTTCGTCGCGG |
| 35 | hCoV-19/Italy/SPL1/2020 EPI_ISL_412974 2020-01-29                    | 83.1% | 80.0% | CTAGGTTTTCGTCGCGG |
| 36 | hCoV-19/Japan/DP0005/2020 EPI_ISL_416565 2020-02-15                  | 88.4% | 85.9% | CTAGGTTTTCGTCGCGG |
| 37 | hCoV-19/Jiangsu/JS01/2020 EPI_ISL_411950 2020-01-23                  | 82.2% | 79.8% | CTAGGTTTTCGTCGCGG |
| 38 | hCoV-19/Jiangsu/JS02/2020 EPI_ISL_411952 2020-01-24                  | 82.2% | 79.8% | CTAGGTTTTCGTCGCGG |
| 39 | hCoV-19/Jiangxi/IVDC-JX-002/2020 EPI_ISL_408486 2020-01-11           | 85.5% | 85.5% | CTAGGTTTTCGTCGCGG |
| 40 | hCoV-19/Jingzhou/HBCDC-HB-01/2020 EPI_ISL_412459 2020-01-08          | 83.5% | 83.8% | CTAGGTTTTCGTCGCGG |
| 41 | hCoV-19/Kuwait/KU09/2020 EPI_ISL_416541 2020-03-02                   | 83.1% | 80.3% | CTAGGTTTTCGTCGCGG |
| 42 | hCoV-19/Lithuania/CHVir1632/2020 EPI_ISL_416741 2020-02              | 85.1% | 84.4% | CTAGGTTTTCGTCGCGG |
| 43 | hCoV-19/Luxembourg/LNS0158952/2020 EPI_ISL_417534 2020-03-18         | 78.5% | 79.5% | CTAGGTTTTCGTCGCGG |
| 44 | hCoV-19/Malaysia/188407/2020 EPI_ISL_417918 2020-03-18               | 95.5% | 83.9% | CTAGGTTTTCGTCGCGG |
| 45 | hCoV-19/Mexico/CDMX-INDRE_01/2020 EPI_ISL_412972 2020-02-27          | 78.9% | 79.6% | CTAGGTTTTCGTCGCGG |
| 46 | hCoV-19/Nanchang/XZ216/2020 EPI_ISL_417420 2020-03-23                | 91.7% | 90.2% | CTAGGTTTTCGTCGCGG |
| 47 | hCoV-19/Nepal/61/2020 EPI_ISL_410301 2020-01-13                      | 90.1% | 86.1% | CTAGGTTTTCGTCGCGG |
| 48 | hCoV-19/Netherlands/Utrecht_1/2020 EPI_ISL_414435 2020-03-03         | 96.3% | 97.5% | CTAGGTTTTCGTCGCGG |
| 49 | hCoV-19/New_Zealand/01/2020 EPI_ISL_413490 2020-02-27                | 97.9% | 95.9% | CTAGGTTTTCGTCGCGG |
| 50 | hCoV-19/Nonthaburi/61/2020 EPI_ISL_403962 2020-01-08                 | 86.4% | 84.2% | CTAGGTTTTCGTCGCGG |
| 51 | hCoV-19/Norway/1379/2020 EPI_ISL_417483 2020-02-27                   | 85.5% | 82.7% | CTAGGTTTTCGTCGCGG |
| 52 | hCoV-19/Pakistan/Gilgit1/2020 EPI_ISL_417444 2020-03-04              | 95.5% | 94.7% | CTAGGTTTTCGTCGCGG |
| 53 | hCoV-19/Panama/328677/2020 EPI_ISL_415152 2020-03-06                 | 81.8% | 79.8% | CTAGGTTTTCGTCGCGG |
| 54 | hCoV-19/pangolin/Guangdong/1/2019 EPI_ISL_410721 2019                | 81.4% | 78.9% | CTAGGTTTTCGTCGCGG |
| 55 | hCoV-19/Peru/010/2020 EPI_ISL_415787 2020-03-10                      | 87.6% | 84.1% | CTAGGTTTTCGTCGCGG |
| 56 | hCoV-19/Poland/PL_P1/2020 EPI_ISL_416488 2020-03-03                  | 82.2% | 79.4% | CTAGGTTTTCGTCGCGG |
| 57 | hCoV-19/Portugal/CV62/2020 EPI_ISL_413647 2020-03-01                 | 81.8% | 80.2% | CTAGGTTTTCGTCGCGG |
| 58 | hCoV-19/Russia/StPetersburg-3524/2020 EPI_ISL_415710 2020-03-15      | 77.3% | 79.2% | CTAG              |
| 59 | hCoV-19/Saudi_Arabia/KAIMRC-Alghoribi/2020 EPI_ISL_416432 2020-03-07 | 72.7% | 76.2% | CTAGGTTTTCGTCGCGG |
| 60 | hCoV-19/Scotland/CVR05/2020 EPI_ISL_414027 2020-03-04                | 97.9% | 96.3% | CTAGGTTTTCGTCGCGG |
| 61 | hCoV-19/Senegal/003/2020 EPI_ISL_418206 2020-02-28                   | 96.7% | 95.5% | CTAGGTTTTCGTCGCGG |
| 62 | hCoV-19/Shandong/IVDC-SD-001/2020 EPI_ISL_408482 2020-01-19          | 83.9% | 84.2% | CTAGGTTTTCGTCGCGG |
| 63 | hCoV-19/Shanghai/SH0002/2020 EPI_ISL_416316 2020-01-25               | 93.4% | 91.8% | CTAGGTTTTCGTCGCGG |
| 64 | hCoV-19/Shenzhen/HKU-SZ-002/2020 EPI_ISL_406030 2020-01-10           | 92.6% | 92.5% | CTAGGTTTTCGTCGCGG |
| 65 | hCoV-19/Sichuan/IVDC-SC-001/2020 EPI_ISL_408484 2020-01-15           | 85.5% | 85.5% | CTAGGTTTTCGTCGCGG |
| 66 | hCoV-19/Singapore/1/2020 EPI_ISL_406973 2020-01-23                   | 82.6% | 79.9% | CTAGGTTTTCGTCGCGG |
| 67 | hCoV-19/Slovakia/SK-BMCL1/2020 EPI_ISL_417877 2020-03-06             | 81.4% | 80.7% | CTAGGTTTTCGTCGCGG |
| 68 | hCoV-19/South_Africa/R03006-20/2020 EPI_ISL_417186 2020-03-07        | 78.1% | 79.4% | CTAGGTTTTCGTCGCGG |
| 69 | hCoV-19/South_Korea/KMCO3/2020 EPI_ISL_407193 2020-01-25             | 91.3% | 90.9% | CTAGGTTTTCGTCGCGG |
| 70 | hCoV-19/Spain/Madrid_H10_39/2020 EPI_ISL_417963 2020-03-12           | 95.9% | 96.3% | CTAGGTTTTCGTCGCGG |
| 71 | hCoV-19/Sweden/01/2020 EPI_ISL_411951 2020-02-07                     | 83.5% | 80.1% | CTAGGTTTTCGTCGCGG |
| 72 | hCoV-19/Switzerland/1000477377/2020 EPI_ISL_413020 2020-02-27        | 78.1% | 79.4% | CTAGGTTTTCGTCGCGG |
| 73 | hCoV-19/Taiwan/2/2020 EPI_ISL_406031 2020-01-23                      | 85.1% | 81.3% | CTAGGTTTTCGTCGCGG |
| 74 | hCoV-19/USA/AZ1/2020 EPI_ISL_406223 2020-01-22                       | 84.3% | 80.2% | CTAGGTTTTCGTCGCGG |
| 75 | hCoV-19/Vietnam/19-01S/2020 EPI_ISL_418269 2020-01-22                | 81.4% | 79.7% | CTAGGTTTTCGTCGCGG |
| 76 | hCoV-19/Wales/PHW04/2020 EPI_ISL_415041 2020-03-07                   | 97.9% | 95.2% | CTAGGTTTTCGTCGCGG |
| 77 | hCoV-19/Wuhan/HBCDC-HB-01/2019 EPI_ISL_402132 2019-12-30             | 84.7% | 84.0% | CTAGGTTTTCGTCGCGG |
| 78 | hCoV-19/Wuhan-Hu-1/2019 EPI_ISL_402125 2019-12-31                    | 83.1% | 80.0% | CTAGGTTTTCGTCGCGG |
| 79 | hCoV-19/Yunnan/IVDC-YN-003/2020 EPI_ISL_408480 2020-01-17            | 82.2% | 81.8% | CTAGGTTTTCGTCGCGG |
| 80 | hCoV-19/Zhejiang/WZ-01/2020 EPI_ISL_404227 2020-01-16                | 89.3% | 87.4% | CTAGGTTTTCGTCGCGG |

consensus/10%  
consensus/90%  
consensus/80%  
consensus/70%

|    |                                                                      |        |        |                |
|----|----------------------------------------------------------------------|--------|--------|----------------|
| 1  | hCoV-19/Algeria/G0638_2264/2020 EPI_ISL_418241 2020-03-02            | 100.0% | 100.0% | cov pid 321    |
| 2  | hCoV-19/Australia/NSW01/2020 EPI_ISL_407893 2020-01-24               | 97.9%  | 96.3%  |                |
| 3  | hCoV-19/bat/Yunnan/RatG13/2013 EPI_ISL_402131 2013-07-24             | 86.4%  | 84.4%  |                |
| 4  | hCoV-19/Beijing/105/2020 EPI_ISL_413518 2020-01-26                   | 82.6%  | 79.9%  |                |
| 5  | hCoV-19/Belgium/BA-02291/2020 EPI_ISL_415159 2020-02-29              | 90.9%  | 90.2%  |                |
| 6  | hCoV-19/Brazil/AMBR-02/2020 EPI_ISL_417034 2020-03-16                | 100.0% | 98.0%  |                |
| 7  | hCoV-19/Cambodia/188407/2020 EPI_ISL_417918 2020-03-18               | 82.2%  | 79.4%  |                |
| 8  | hCoV-19/Canada/BCC_02421/2020 EPI_ISL_415561 2020-03-01              | 97.9%  | 96.3%  |                |
| 9  | hCoV-19/Chile/Santiago_op2d1/2020 EPI_ISL_415658 2020-03-06          | 97.5%  | 97.9%  |                |
| 10 | hCoV-19/China/IQT001/2020 EPI_ISL_412966 2020-02-05                  | 81.0%  | 78.6%  |                |
| 11 | hCoV-19/China/WHU02/2020 EPI_ISL_406717 2020-01-02                   | 83.1%  | 80.3%  |                |
| 12 | hCoV-19/Chongqing/IVDC-CQ-001/2020 EPI_ISL_408481 2020-01-18         | 81.4%  | 82.0%  |                |
| 13 | hCoV-19/Congo/108/2020 EPI_ISL_417948 2020-03-19                     | 85.1%  | 82.1%  |                |
| 14 | hCoV-19/Denmark/SSI-01/2020 EPI_ISL_416142 2020-02-26                | 91.7%  | 90.2%  |                |
| 15 | hCoV-19/England/01/2020 EPI_ISL_407071 2020-01-29                    | 85.1%  | 82.0%  |                |
| 16 | hCoV-19/Finland/1/2020 EPI_ISL_407079 2020-01-29                     | 88.4%  | 84.9%  |                |
| 17 | hCoV-19/Foshan/20SF207/2020 EPI_ISL_406534 2020-01-22                | 90.9%  | 89.0%  |                |
| 18 | hCoV-19/France/ARA094100/2020 EPI_ISL_418412 2020-03-15              | 85.5%  | 84.8%  |                |
| 19 | hCoV-19/Fujian/13/2020 EPI_ISL_411066 2020-01-22                     | 83.5%  | 80.1%  |                |
| 20 | hCoV-19/Gaetgia/Tb/2020 EPI_ISL_416482 2020-03-13                    | 84.3%  | 81.6%  |                |
| 21 | hCoV-19/Germany/Baden-Wuerttemberg-1/2020 EPI_ISL_412912 2020-02-25  | 95.0%  | 99.1%  |                |
| 22 | hCoV-19/Germany/BavPat1/2020 EPI_ISL_406862 2020-01-28               | 97.9%  | 96.7%  |                |
| 23 | hCoV-19/Germany/NRW-01/2020 EPI_ISL_413488 2020-02-28                | 97.9%  | 95.9%  |                |
| 24 | hCoV-19/Greece/10/2020 EPI_ISL_418263 2020-03-18                     | 83.5%  | 80.5%  |                |
| 25 | hCoV-19/Guangdong/2020XN4243-P0035/2020 EPI_ISL_413853 2020-01-30    | 85.5%  | 88.0%  |                |
| 26 | hCoV-19/Guangzhou/20SF206/2020 EPI_ISL_406533 2020-01-22             | 89.7%  | 88.9%  |                |
| 27 | hCoV-19/Hangzhou/HZ-1/2020 EPI_ISL_406970 2020-01-20                 | 83.1%  | 81.0%  |                |
| 28 | hCoV-19/Hefei/2/2020 EPI_ISL_412026 2020-02-23                       | 84.3%  | 80.2%  |                |
| 29 | hCoV-19/Hong_Kong/Casell_21012020/2020 EPI_ISL_417176 2020-01-21     | 97.5%  | 99.6%  |                |
| 30 | hCoV-19/Hungary/2/2020 EPI_ISL_418183 2020-03-17                     | 97.9%  | 94.4%  |                |
| 31 | hCoV-19/Iceland/1/2020 EPI_ISL_417535 2020-03-13                     | 87.2%  | 84.1%  |                |
| 32 | hCoV-19/India/1-31/2020 EPI_ISL_413523 2020-01-31                    | 91.3%  | 88.0%  |                |
| 33 | hCoV-19/Ireland/21023/2020 EPI_ISL_418516 2020-03-06                 | 81.8%  | 78.1%  |                |
| 34 | hCoV-19/Israel/ISR_IT0320/2020 EPI_ISL_419210 2020-03                | 79.8%  | 78.5%  |                |
| 35 | hCoV-19/Italy/SPL1/2020 EPI_ISL_412974 2020-01-29                    | 83.1%  | 80.0%  |                |
| 36 | hCoV-19/Japan/DP0005/2020 EPI_ISL_416565 2020-02-15                  | 88.4%  | 85.9%  | CAGTTTTCGTCGTT |
| 37 | hCoV-19/Jiangsu/JS01/2020 EPI_ISL_411950 2020-01-23                  | 82.2%  | 79.8%  |                |
| 38 | hCoV-19/Jiangsu/JS02/2020 EPI_ISL_411952 2020-01-24                  | 82.2%  | 79.8%  |                |
| 39 | hCoV-19/Jiangxi/IVDC-JX-002/2020 EPI_ISL_408486 2020-01-11           | 85.5%  | 85.5%  |                |
| 40 | hCoV-19/Jingzhou/HBCDC-HB-01/2020 EPI_ISL_412459 2020-01-08          | 83.5%  | 83.8%  |                |
| 41 | hCoV-19/Kuwait/KU09/2020 EPI_ISL_416541 2020-03-02                   | 83.1%  | 80.3%  |                |
| 42 | hCoV-19/Lithuania/CHVir1632/2020 EPI_ISL_416741 2020-02              | 85.1%  | 84.4%  |                |
| 43 | hCoV-19/Luxembourg/LNS0158952/2020 EPI_ISL_417534 2020-03-18         | 78.5%  | 79.5%  |                |
| 44 | hCoV-19/Malaysia/188407/2020 EPI_ISL_417918 2020-03-18               | 95.5%  | 83.9%  |                |
| 45 | hCoV-19/Mexico/CDMX-INDRE_01/2020 EPI_ISL_412972 2020-02-27          | 78.9%  | 79.6%  |                |
| 46 | hCoV-19/Nanchang/XZ216/2020 EPI_ISL_417420 2020-03-23                | 91.7%  | 90.2%  |                |
| 47 | hCoV-19/Nepal/61/2020 EPI_ISL_410301 2020-01-13                      | 90.1%  | 86.1%  |                |
| 48 | hCoV-19/Netherlands/Utrecht_1/2020 EPI_ISL_414435 2020-03-03         | 96.3%  | 97.5%  |                |
| 49 | hCoV-19/New_Zealand/01/2020 EPI_ISL_413490 2020-02-27                | 97.9%  | 95.9%  |                |
| 50 | hCoV-19/Nonthaburi/61/2020 EPI_ISL_403962 2020-01-08                 | 86.4%  | 84.2%  |                |
| 51 | hCoV-19/Norway/1379/2020 EPI_ISL_417483 2020-02-27                   | 85.5%  | 82.7%  |                |
| 52 | hCoV-19/Pakistan/Gilgit1/2020 EPI_ISL_417444 2020-03-04              | 95.5%  | 94.7%  |                |
| 53 | hCoV-19/Panama/328677/2020 EPI_ISL_415152 2020-03-06                 | 81.8%  | 79.8%  |                |
| 54 | hCoV-19/pangolin/Guangdong/1/2019 EPI_ISL_410721 2019                | 81.4%  | 78.9%  |                |
| 55 | hCoV-19/Peru/010/2020 EPI_ISL_415787 2020-03-10                      | 87.6%  | 84.1%  |                |
| 56 | hCoV-19/Poland/PL_P1/2020 EPI_ISL_416488 2020-03-03                  | 82.2%  | 79.4%  |                |
| 57 | hCoV-19/Portugal/CV62/2020 EPI_ISL_413647 2020-03-01                 | 81.8%  | 80.2%  |                |
| 58 | hCoV-19/Russia/StPetersburg-3524/2020 EPI_ISL_415710 2020-03-15      | 77.3%  | 79.2%  |                |
| 59 | hCoV-19/Saudi_Arabia/KAIMRC-Alghoribi/2020 EPI_ISL_416432 2020-03-07 | 72.7%  | 76.2%  |                |
| 60 | hCoV-19/Scotland/CVR05/2020 EPI_ISL_414027 2020-03-04                | 97.9%  | 96.3%  |                |
| 61 | hCoV-19/Senegal/003/2020 EPI_ISL_418206 2020-02-28                   | 96.7%  | 95.5%  |                |
| 62 | hCoV-19/Shandong/IVDC-SD-001/2020 EPI_ISL_408482 2020-01-19          | 83.9%  | 84.2%  |                |
| 63 | hCoV-19/Shanghai/SH0002/2020 EPI_ISL_416316 2020-01-25               | 93.4%  | 91.8%  |                |

|    |                                                                      |        |        |           |
|----|----------------------------------------------------------------------|--------|--------|-----------|
| 64 | hCoV-19/Shenzhen/HKU-SZ-002/2020 EPI_ISL_406030 2020-01-10           | 92.6%  | 92.5%  | -----     |
| 65 | hCoV-19/Sichuan/IVDC-SC-001/2020 EPI_ISL_408484 2020-01-15           | 85.5%  | 85.5%  | -----     |
| 66 | hCoV-19/Singapore/1/2020 EPI_ISL_406973 2020-01-23                   | 82.6%  | 79.9%  | -----     |
| 67 | hCoV-19/Slovakia/SK-BMCL/2020 EPI_ISL_417877 2020-03-06              | 81.4%  | 80.7%  | -----     |
| 68 | hCoV-19/South_Africa/R03006-20/2020 EPI_ISL_417186 2020-03-07        | 78.1%  | 79.4%  | -----     |
| 69 | hCoV-19/South_Korea/KCDC03/2020 EPI_ISL_407193 2020-01-25            | 91.3%  | 90.9%  | -----     |
| 70 | hCoV-19/Spain/Madrid_H10_39/2020 EPI_ISL_417963 2020-03-12           | 95.9%  | 96.3%  | -----     |
| 71 | hCoV-19/Sweden/01/2020 EPI_ISL_411951 2020-02-07                     | 83.5%  | 80.1%  | -----     |
| 72 | hCoV-19/Switzerland/1000477377/2020 EPI_ISL_413020 2020-02-27        | 78.1%  | 79.4%  | -----     |
| 73 | hCoV-19/Taiwan/2/2020 EPI_ISL_406031 2020-01-23                      | 85.1%  | 81.3%  | -----     |
| 74 | hCoV-19/USA/AZ1/2020 EPI_ISL_406223 2020-01-22                       | 84.3%  | 80.2%  | -----     |
| 75 | hCoV-19/Vietnam/19-01S/2020 EPI_ISL_418269 2020-01-22                | 81.4%  | 79.7%  | -----     |
| 76 | hCoV-19/Wales/PHW04/2020 EPI_ISL_415041 2020-03-07                   | 97.9%  | 95.2%  | -----     |
| 77 | hCoV-19/Wuhan/HBCCDC-HB-01/2019 EPI_ISL_402132 2019-12-30            | 84.7%  | 84.0%  | -----     |
| 78 | hCoV-19/Wuhan-Hu-1/2019 EPI_ISL_402125 2019-12-31                    | 83.1%  | 80.0%  | -----     |
| 79 | hCoV-19/Yunnan/IVDC-YN-003/2020 EPI_ISL_408480 2020-01-17            | 82.2%  | 81.8%  | -----     |
| 80 | hCoV-19/Zhejiang/WZ-01/2020 EPI_ISL_404227 2020-01-16                | 89.3%  | 87.4%  | -----     |
|    | consensus/100%                                                       | .....  | .....  | .....     |
|    | consensus/90%                                                        | .....  | .....  | .....     |
|    | consensus/80%                                                        | .....  | .....  | .....     |
|    | consensus/70%                                                        | .....  | .....  | .....     |
|    |                                                                      | cov    | pid    | 401 ] 403 |
| 1  | hCoV-19/Algeria/G0638_2264/2020 EPI_ISL_418241 2020-03-02            | 100.0% | 100.0% | ---       |
| 2  | hCoV-19/Australia/NSW01/2020 EPI_ISL_407893 2020-01-24               | 97.9%  | 96.3%  | ---       |
| 3  | hCoV-19/bat/Yunnan/RaTG13/2013 EPI_ISL_402131 2013-07-24             | 86.4%  | 84.4%  | ---       |
| 4  | hCoV-19/Beijing/105/2020 EPI_ISL_413518 2020-01-26                   | 82.6%  | 79.9%  | ---       |
| 5  | hCoV-19/Belgium/BA-02291/2020 EPI_ISL_415159 2020-02-29              | 90.9%  | 90.2%  | ---       |
| 6  | hCoV-19/Brazil/AMBR-02/2020 EPI_ISL_417034 2020-03-16                | 100.0% | 98.0%  | ---       |
| 7  | hCoV-19/Cambodia/0012/2020 EPI_ISL_411902 2020-01-27                 | 82.2%  | 80.2%  | ---       |
| 8  | hCoV-19/Canada/BC_02421/2020 EPI_ISL_415581 2020-03-01               | 97.9%  | 96.3%  | ---       |
| 9  | hCoV-19/Chile/Santiago_cp2d1/2020 EPI_ISL_415658 2020-03-06          | 97.5%  | 97.9%  | ---       |
| 10 | hCoV-19/China/IQT001/2020 EPI_ISL_412966 2020-02-05                  | 81.0%  | 78.6%  | ---       |
| 11 | hCoV-19/China/WHU02/2020 EPI_ISL_406717 2020-01-02                   | 83.1%  | 80.3%  | ---       |
| 12 | hCoV-19/Chongqing/IVDC-CQ-001/2020 EPI_ISL_408481 2020-01-18         | 81.4%  | 82.0%  | ---       |
| 13 | hCoV-19/Congo/108/2020 EPI_ISL_417948 2020-03-19                     | 85.1%  | 82.1%  | ---       |
| 14 | hCoV-19/Denmark/SSI-01/2020 EPI_ISL_416142 2020-02-26                | 91.7%  | 90.2%  | ---       |
| 15 | hCoV-19/England/01/2020 EPI_ISL_407071 2020-01-29                    | 85.1%  | 82.0%  | ---       |
| 16 | hCoV-19/Finland/1/2020 EPI_ISL_407079 2020-01-29                     | 88.4%  | 84.9%  | ---       |
| 17 | hCoV-19/Foshan/20SF207/2020 EPI_ISL_406534 2020-01-22                | 90.9%  | 89.0%  | ---       |
| 18 | hCoV-19/France/ARA094100/2020 EPI_ISL_418412 2020-03-15              | 85.5%  | 84.8%  | ---       |
| 19 | hCoV-19/Fujian/13/2020 EPI_ISL_411066 2020-01-22                     | 83.5%  | 80.1%  | ---       |
| 20 | hCoV-19/Georgia/Tb/2020 EPI_ISL_416482 2020-03-13                    | 84.3%  | 81.6%  | ---       |
| 21 | hCoV-19/Germany/Baden-Wuerttemberg-1/2020 EPI_ISL_412912 2020-02-25  | 95.0%  | 99.1%  | ---       |
| 22 | hCoV-19/Germany/BavPat1/2020 EPI_ISL_416062 2020-01-28               | 97.9%  | 96.7%  | ---       |
| 23 | hCoV-19/Germany/NRW-01/2020 EPI_ISL_413488 2020-02-28                | 97.9%  | 95.9%  | ---       |
| 24 | hCoV-19/Greece/10/2020 EPI_ISL_418263 2020-03-18                     | 83.5%  | 80.5%  | ---       |
| 25 | hCoV-19/Guangdong/2020XN4243-P0035/2020 EPI_ISL_413853 2020-01-30    | 85.5%  | 88.0%  | ---       |
| 26 | hCoV-19/Guangzhou/20SF206/2020 EPI_ISL_406533 2020-01-22             | 89.7%  | 88.9%  | ---       |
| 27 | hCoV-19/Hangzhou/HZ-1/2020 EPI_ISL_406970 2020-01-20                 | 83.1%  | 81.0%  | ---       |
| 28 | hCoV-19/Hefei/2/2020 EPI_ISL_412026 2020-02-23                       | 84.3%  | 80.2%  | ---       |
| 29 | hCoV-19/Hong_Kong/Casell_21012020/2020 EPI_ISL_417176 2020-01-21     | 97.5%  | 99.6%  | ---       |
| 30 | hCoV-19/Hungary/2/2020 EPI_ISL_418183 2020-03-17                     | 97.9%  | 94.4%  | ---       |
| 31 | hCoV-19/Iceland/1/2020 EPI_ISL_417535 2020-03-13                     | 87.2%  | 84.1%  | ---       |
| 32 | hCoV-19/India/1-31/2020 EPI_ISL_413523 2020-01-31                    | 91.3%  | 88.0%  | ---       |
| 33 | hCoV-19/Ireland/21023/2020 EPI_ISL_418516 2020-03-06                 | 81.8%  | 78.1%  | ---       |
| 34 | hCoV-19/Israel/ISR_IT0320/2020 EPI_ISL_419210 2020-03                | 79.8%  | 78.5%  | ---       |
| 35 | hCoV-19/Italy/SPI1/2020 EPI_ISL_412974 2020-01-29                    | 83.1%  | 80.0%  | ---       |
| 36 | hCoV-19/Japan/DP0005/2020 EPI_ISL_416565 2020-02-15                  | 88.4%  | 85.9%  | ---       |
| 37 | hCoV-19/Jiangsu/JS01/2020 EPI_ISL_411950 2020-01-23                  | 82.2%  | 79.8%  | ---       |
| 38 | hCoV-19/Jiangsu/JS02/2020 EPI_ISL_411952 2020-01-24                  | 82.2%  | 79.8%  | ---       |
| 39 | hCoV-19/Jiangxi/IVDC-JX-002/2020 EPI_ISL_408486 2020-01-11           | 85.5%  | 85.5%  | ---       |
| 40 | hCoV-19/Jingzhou/HBCCDC-HB-01/2020 EPI_ISL_412459 2020-01-08         | 83.5%  | 83.8%  | ---       |
| 41 | hCoV-19/Kuwait/KU09/2020 EPI_ISL_416541 2020-03-02                   | 83.1%  | 80.3%  | ---       |
| 42 | hCoV-19/Lithuania/ChVir1632/2020 EPI_ISL_416741 2020-02              | 85.1%  | 84.4%  | ---       |
| 43 | hCoV-19/Luxembourg/LNS0158952/2020 EPI_ISL_417534 2020-03-18         | 78.5%  | 79.5%  | ---       |
| 44 | hCoV-19/Malaysia/188407/2020 EPI_ISL_417918 2020-03-18               | 95.5%  | 93.9%  | ---       |
| 45 | hCoV-19/Mexico/CDMX-INDRE_01/2020 EPI_ISL_412972 2020-02-27          | 78.9%  | 79.6%  | ---       |
| 46 | hCoV-19/NanChang/JX216/2020 EPI_ISL_417420 2020-03-23                | 91.7%  | 90.2%  | ---       |
| 47 | hCoV-19/Nepal/61/2020 EPI_ISL_410301 2020-01-13                      | 90.1%  | 86.1%  | ---       |
| 48 | hCoV-19/Netherlands/Utrecht_1/2020 EPI_ISL_414435 2020-03-03         | 96.3%  | 97.5%  | ---       |
| 49 | hCoV-19/New_Zealand/01/2020 EPI_ISL_413490 2020-02-27                | 97.9%  | 95.9%  | ---       |
| 50 | hCoV-19/Nonthaburi/61/2020 EPI_ISL_403962 2020-01-08                 | 86.4%  | 84.2%  | ---       |
| 51 | hCoV-19/Norway/1379/2020 EPI_ISL_417483 2020-02-27                   | 85.5%  | 82.7%  | ---       |
| 52 | hCoV-19/Pakistan/Gilgit1/2020 EPI_ISL_417444 2020-03-04              | 95.5%  | 94.7%  | ---       |
| 53 | hCoV-19/Panama/328677/2020 EPI_ISL_415152 2020-03-06                 | 81.8%  | 79.8%  | ---       |
| 54 | hCoV-19/pangolin/Guangdong/1/2019 EPI_ISL_410721 2019                | 81.4%  | 78.9%  | ---       |
| 55 | hCoV-19/Peru/010/2020 EPI_ISL_415787 2020-03-10                      | 87.6%  | 84.1%  | ---       |
| 56 | hCoV-19/Poland/PL_P1/2020 EPI_ISL_416488 2020-03-03                  | 82.2%  | 79.4%  | ---       |
| 57 | hCoV-19/Portugal/CV62/2020 EPI_ISL_413647 2020-03-01                 | 81.8%  | 80.2%  | ---       |
| 58 | hCoV-19/Russia/StPetersburg-3524/2020 EPI_ISL_415710 2020-03-15      | 77.3%  | 79.2%  | ---       |
| 59 | hCoV-19/Saudi_Arabia/KAIMRC-Alghoribi/2020 EPI_ISL_416432 2020-03-07 | 72.7%  | 76.2%  | ---       |
| 60 | hCoV-19/Scotland/CVR05/2020 EPI_ISL_414027 2020-03-04                | 97.9%  | 96.3%  | ---       |
| 61 | hCoV-19/Senegal/003/2020 EPI_ISL_418206 2020-02-28                   | 96.7%  | 95.5%  | ---       |
| 62 | hCoV-19/Shandong/IVDC-SD-001/2020 EPI_ISL_408482 2020-01-19          | 83.9%  | 84.2%  | ---       |
| 63 | hCoV-19/Shanghai/SH0002/2020 EPI_ISL_416316 2020-01-25               | 93.4%  | 91.8%  | ---       |
| 64 | hCoV-19/Shenzhen/HKU-SZ-002/2020 EPI_ISL_406030 2020-01-10           | 92.6%  | 92.5%  | ---       |
| 65 | hCoV-19/Sichuan/IVDC-SC-001/2020 EPI_ISL_408484 2020-01-15           | 85.5%  | 85.5%  | ---       |
| 66 | hCoV-19/Singapore/1/2020 EPI_ISL_406973 2020-01-23                   | 82.6%  | 79.9%  | ---       |
| 67 | hCoV-19/Slovakia/SK-BMCL/2020 EPI_ISL_417877 2020-03-06              | 81.4%  | 80.7%  | ---       |
| 68 | hCoV-19/South_Africa/R03006-20/2020 EPI_ISL_417186 2020-03-07        | 78.1%  | 79.4%  | ---       |
| 69 | hCoV-19/South_Korea/KCDC03/2020 EPI_ISL_407193 2020-01-25            | 91.3%  | 90.9%  | ---       |
| 70 | hCoV-19/Spain/Madrid_H10_39/2020 EPI_ISL_417963 2020-03-12           | 95.9%  | 96.3%  | ---       |
| 71 | hCoV-19/Sweden/01/2020 EPI_ISL_411951 2020-02-07                     | 83.5%  | 80.1%  | ---       |
| 72 | hCoV-19/Switzerland/1000477377/2020 EPI_ISL_413020 2020-02-27        | 78.1%  | 79.4%  | ---       |
| 73 | hCoV-19/Taiwan/2/2020 EPI_ISL_406031 2020-01-23                      | 85.1%  | 81.3%  | ---       |
| 74 | hCoV-19/USA/AZ1/2020 EPI_ISL_406223 2020-01-22                       | 84.3%  | 80.2%  | ---       |
| 75 | hCoV-19/Vietnam/19-01S/2020 EPI_ISL_418269 2020-01-22                | 81.4%  | 79.7%  | ---       |
| 76 | hCoV-19/Wales/PHW04/2020 EPI_ISL_415041 2020-03-07                   | 97.9%  | 95.2%  | ---       |
| 77 | hCoV-19/Wuhan/HBCCDC-HB-01/2019 EPI_ISL_402132 2019-12-30            | 84.7%  | 84.0%  | ---       |
| 78 | hCoV-19/Wuhan-Hu-1/2019 EPI_ISL_402125 2019-12-31                    | 83.1%  | 80.0%  | ---       |
| 79 | hCoV-19/Yunnan/IVDC-YN-003/2020 EPI_ISL_408480 2020-01-17            | 82.2%  | 81.8%  | ---       |
| 80 | hCoV-19/Zhejiang/WZ-01/2020 EPI_ISL_404227 2020-01-16                | 89.3%  | 87.4%  | ---       |
|    | consensus/100%                                                       | .....  | .....  | .....     |
|    | consensus/90%                                                        | .....  | .....  | .....     |
|    | consensus/80%                                                        | .....  | .....  | .....     |
|    | consensus/70%                                                        | .....  | .....  | .....     |

# 5'UTR of all SARS-CoV isolates

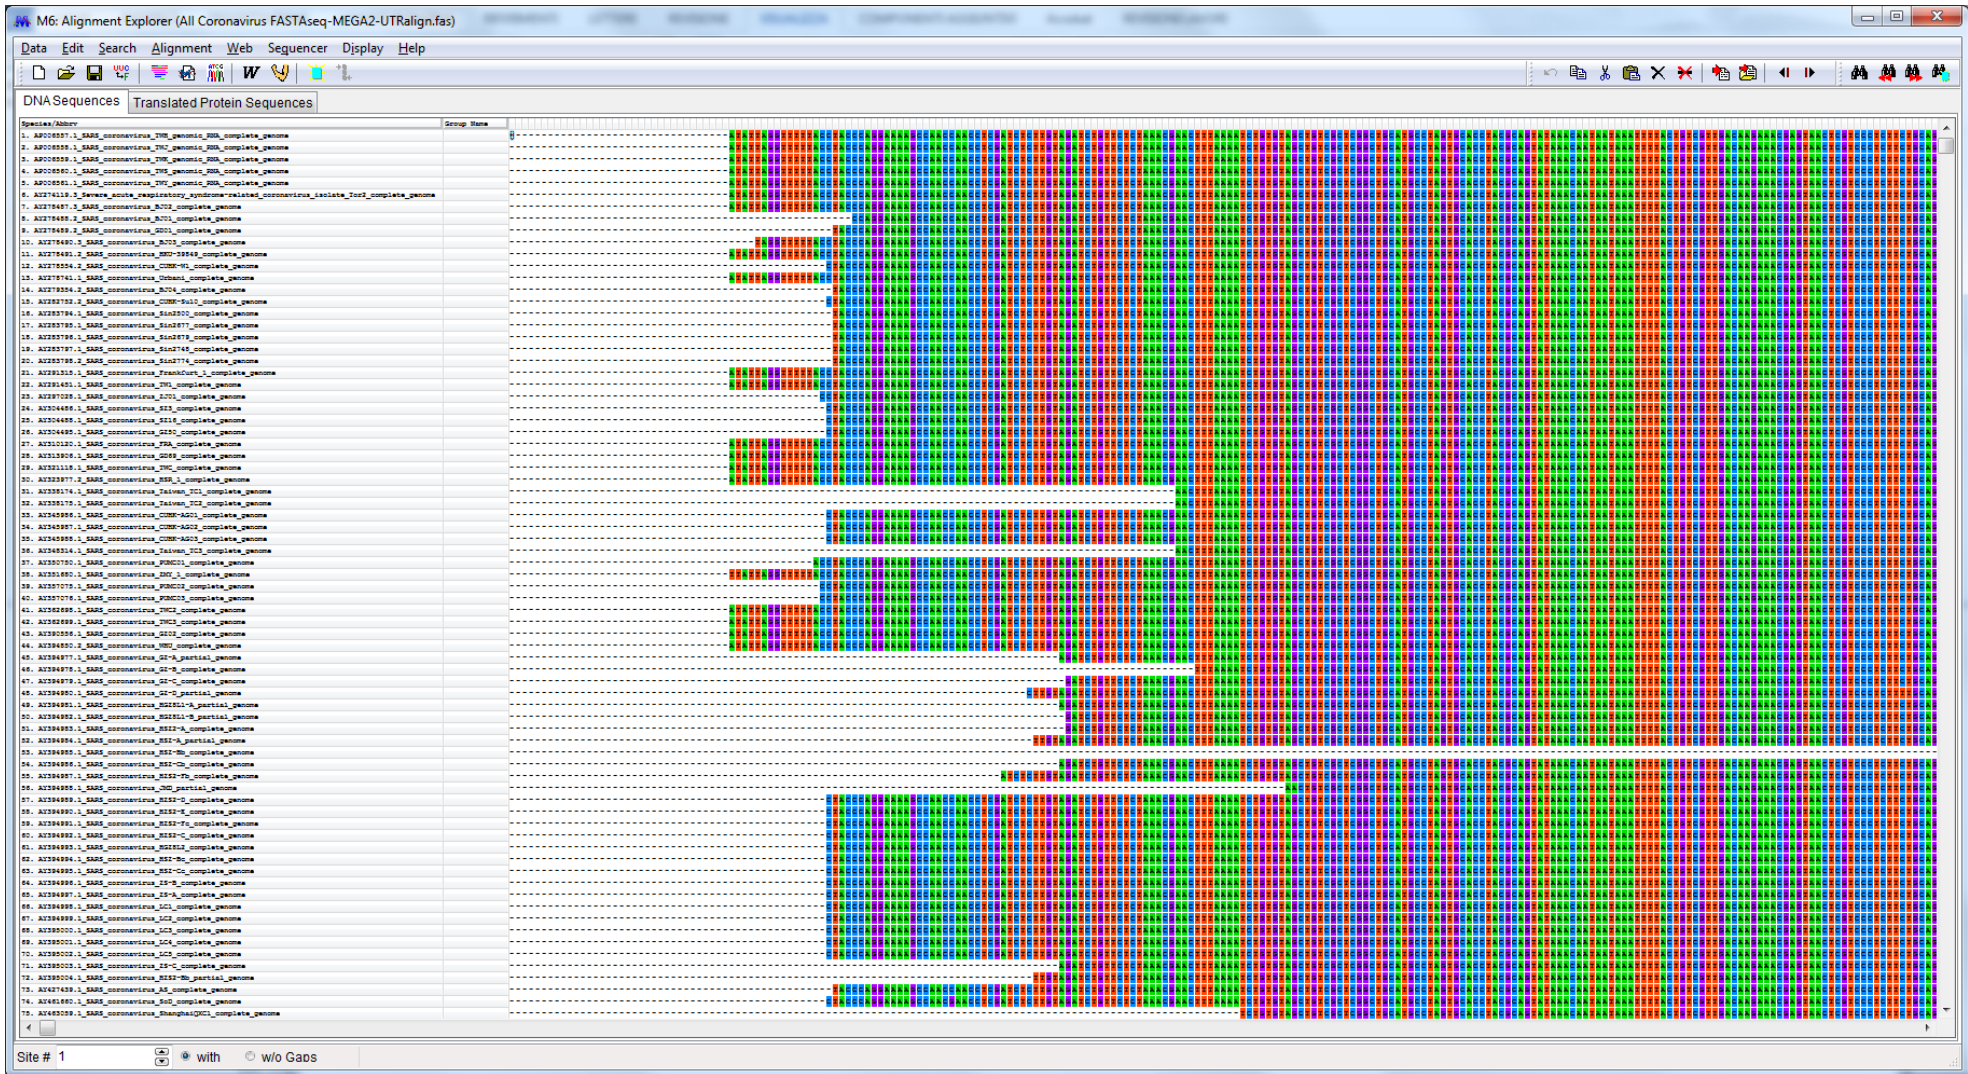

# 5'UTR of all SARS-CoV-2 isolates

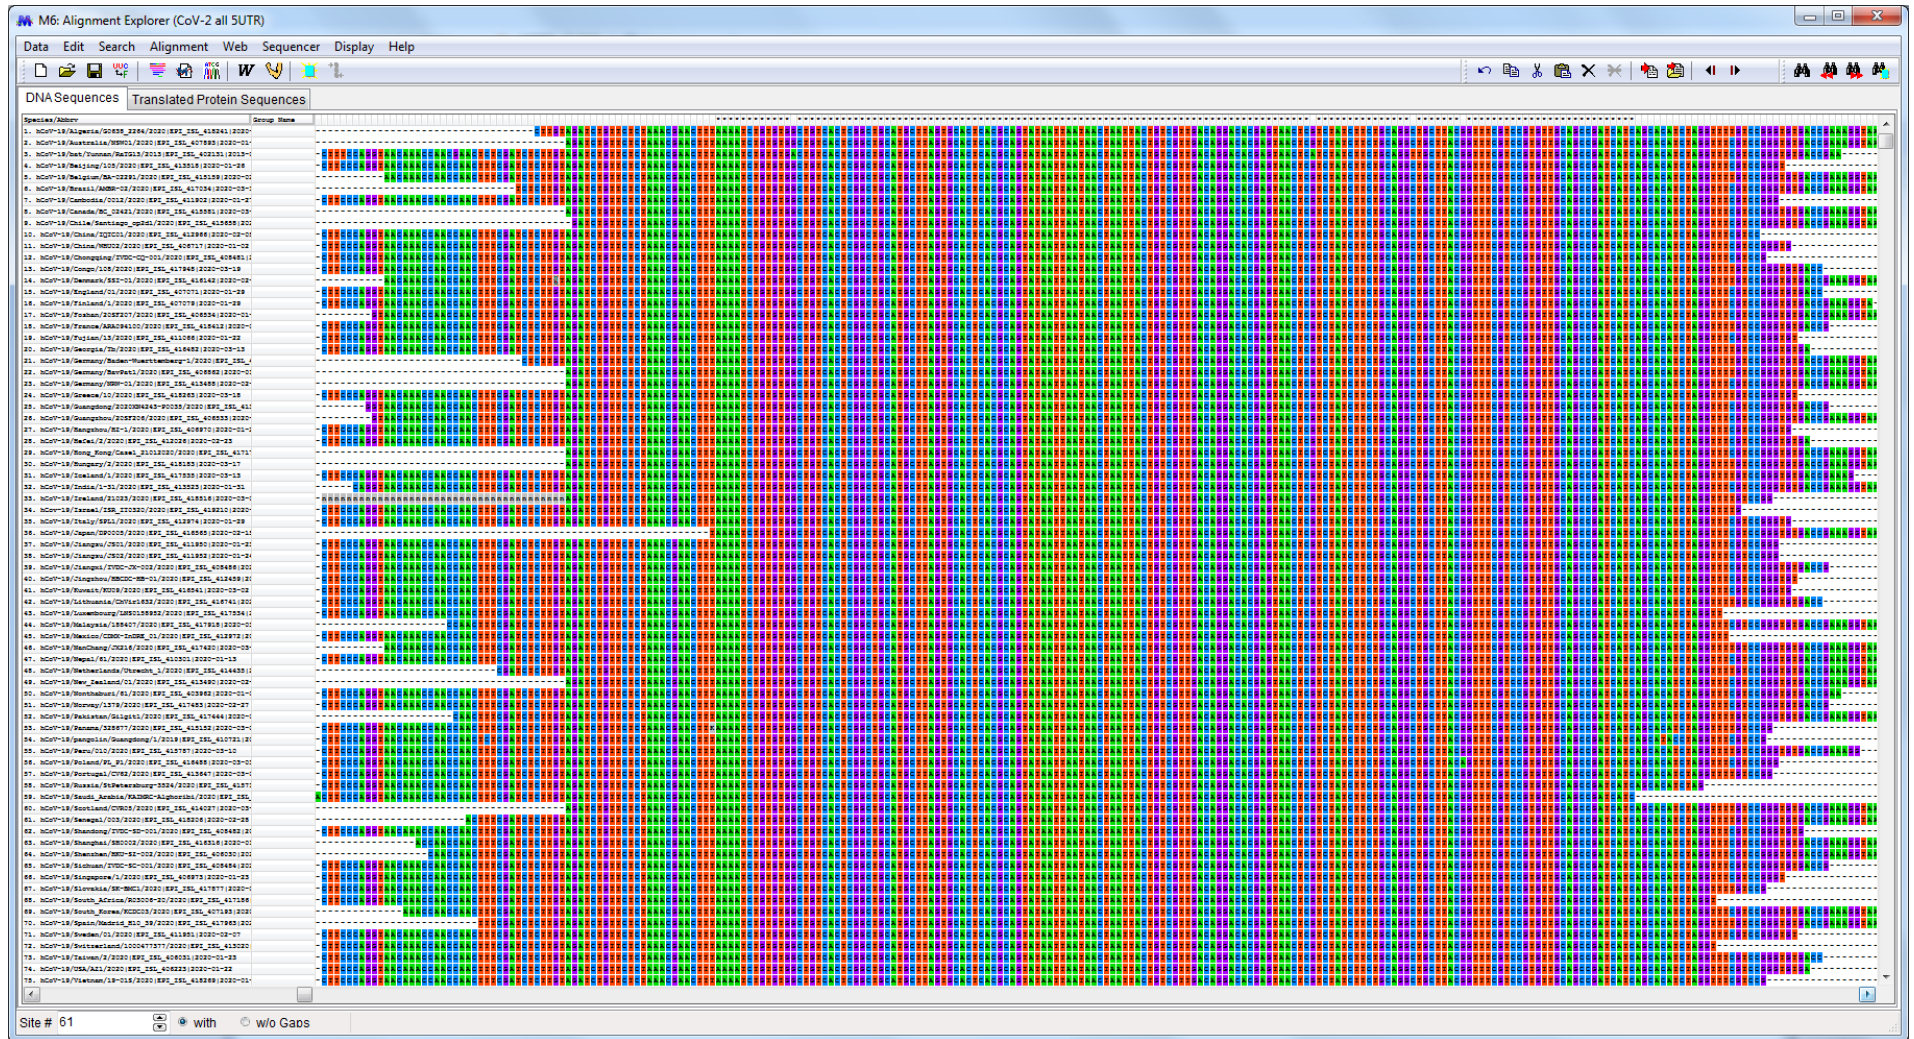

Supplement: Supplementary file 1 [file supplementary]
